# Supplementary material
Source: publisher figshare collection journal article supplement (https://gsapubs.figshare.com/ndownloader/files/23298473)
Supplement: Supplementary file 1 [file 23298473]

**SUPPLEMENTARY MATERIAL****Southern Laurentide ice-sheet retreat synchronous with rising boreal summer insolation**

David J. Ullman\*, Anders E. Carlson, Allegra N. LeGrande, Angus K. Moore, Faron S. Anslow, Marc Caffee, Kent M. Syverson, Joseph M. Licciardi

\*Corresponding author: [dullman@coas.oregonstate.edu](mailto:dullman@coas.oregonstate.edu)

***Field methods and site descriptions***

- We limit the impact of landscape change (Schulte et al., 2007) and post-glacial disturbance on exposure surfaces through the sampling the surfaces of large quartz-bearing glacial erratics in regions of WI with minimal human disturbance. Large, far-travelled glacial erratics have been shown to exhibit less cosmogenic inheritance than bedrock surfaces, particularly in regions where cold-based ice may have limited subglacial scouring (Corbett et al., 2013). We focus our site selection on stable topographic highs away from collapsed ice features with minimal till cover. Due to such geomorphic setting, topographic shielding correction was unnecessary for all of the samples. We preferentially selected boulders that were large in size (>1 m in diameter and height) and showed minimal signs of surface erosion (no pitting or spalling). For individual sample information on location, elevation, and thickness see Table DR1.
- The Baraboo Hills are a Proterozoic quartzite syncline in south-central WI. The eastern half of this range was covered by the sLIS during the LGM, depositing erratic boulders on top of the quartzite bedrock as part of the Johnstown LGM moraine (Clayton and Attig, 1990). We sampled far-traveled granite boulders in addition to local quartzite and sandstone boulders deposited in a prominent boulder-train moraine resting directly on bedrock (site sGBL) (Fig. DR1).
- About 10 km to the northeast, the i-sGBL site lies atop another quartzite hill, which was covered by ice during the LGM and exposed following ice-retreat from the terminal moraine (Fig. DR1) (Clayton and Attig, 1990). The lack of moraines in between i-sGBL and sGBL indicates a continuous retreat pattern between the two sampling locations.
- The Blue Hills are an outcrop of erosion-resistant quartzite in north-central WI of similar age to the Baraboo Hills (Mudrey et al., 1982). LGM ice covered most of the bedrock topographic highs in the Blue Hills. Site CL is along this maximum extent of the LGM phase of the Chippewa Lobe (Attig et al., 1985; Johnson, 1986), whereas the i-CL site is located ~12 km to the northeast of the terminal moraine (Fig. DR2). No moraines exist between CL and i-CL suggesting no stable ice margin positions between these two sites.
- The Gogebic Mountains (site GM) in northern Wisconsin are a high-relief set of parallel ridgelines of metasedimentary and meta-volcanic bedrock (Cannon et al., 2007). We sampled glacial erratics at GM resting directly on bedrock of these flat-topped topographic highs (Fig. DR3, DR4).
- The northern Green Bay Lobe (nGBL) samples come from a high-relief section of the prominent LGM Hancock Moraine that is correlative to the Johnstown Moraine (Fig. DR5) (Attig et al., 1985). The samples are from 2 stable sections of the Hancock Moraine crest, away from ice-collapse features (Fig. DR6, DR7).
- The inner nGBL site (i-nGBL) lies ~15 km east of the LGM extent of the LIS in the interlobate region of the Langlade and Green Bay Lobes, where the recessional Summit Lake Moraine of the Langlade Lobe and Bowler Moraine of the Green Bay Lobe connect (Attig et al., 1985; Fig. DR4, DR8). The Summit Lake Moraine is correlative with Tiger Cat and Flambeau moraines to the west. The Bowler Moraine continues south where it is called the Green Lake Moraine in southeast WI. We sampled boulders from a

constructional deposit that accumulated in an ice cavity (Mickelson, 1986). The exposure ages from these boulders are associated with the retreat of ice from this location.

### **Laboratory methods**

- Sample preparation and isolation of BeO was conducted in the Cosmogenic Isotope Laboratory at the University of Wisconsin-Madison (UW).
- Each sample was crushed and sieved to separate the 425-841  $\mu\text{m}$  grain-size fraction. The quartz fraction was separated using a Frantz Magnetic Separator to remove mafic grains, followed by etchings with HCl and dilute HF/HNO<sub>3</sub>.
- The purity of this quartz fraction was verified through elemental analysis by Inductive-Coupled Plasma Atomic Emission Spectrometry at University of Colorado-Boulder.
- After addition of Be carrier, the BeO was isolated through a series of dissolution, oxidation, anion/cation removal, pH adjustments, and final sample drydown.
- $^{10}\text{Be}/^9\text{Be}$  ratios were measured by accelerator mass spectrometry (AMS) at Purdue Rare Isotope Measurement (PRIME) Laboratory at Purdue University.
- Throughout this project, the UW Cosmogenic Lab made improvements in the  $^9\text{Be}$  purity of its standard. Initial use of a commercially available Be standard resulted in blank AMS-measured  $^{10}\text{Be}/^9\text{Be}$  ratios that averaged to be  $12.2 \times 10^{-15} \pm 0.9 \times 10^{-15}$  (Claritas, Table DR1, ratio expressed as long-term laboratory mean with standard error as uncertainty). An intermediate standard of higher purity resulted in  $^{10}\text{Be}/^9\text{Be}$  ratios that averaged to be  $3.4 \times 10^{-15} \pm 0.4 \times 10^{-15}$  (Merck, Table DR1). Use of a new ultra-pure standard developed at Oregon State University (Murray et al., 2012) used in later analysis resulted in average procedural blank  $^{10}\text{Be}/^9\text{Be}$  ratios of  $2.0 \times 10^{-15} \pm 0.3 \times 10^{-15}$  (OSU Blue, Table DR1).
- Sample  $^{10}\text{Be}$  concentrations are shown in Table DR1.

### **Exposure age calculation**

- We used the online CRONUS-Earth calculator (<http://hess.ess.washington.edu/>) to determine exposure ages (Balco et al., 2008) using the northeast North American production rate (NENA, Balco et al., 2009).
- All relevant sample data entered into the online CRONUS-Earth surface exposure calculator is presented in Table DR1.
- Our analysis throughout the text uses the Lal-Stone time-dependent scaling scheme (Lal, 1991; Stone, 2000) for calculating both the new chronology of this study as well as in recalculating the existing  $^{10}\text{Be}$  dates (Colgan et al., 2002; Balco et al., 2009).
- Use of any of the other scaling schemes (Stone, 2000; Desilets et al., 2006; Dunai, 2001; Lifton et al., 2005) does not change the interpretation (within the uncertainty of measurement).

### **Removal of outliers**

- For the timing of initial retreat from the terminal moraines in Wisconsin (sites sGBL, nGBL, and CL), we exclude all ages that are older than 30 ka and younger than 17.5 ka for the Green Bay Lobe dates, because  $^{14}\text{C}$  dates indicate that the sLIS was not present in Wisconsin until after 30 ka (Black, 1976; Attig et al., 1985; Dyke et al., 2002; Clark et al., 2009) and must have retreated from the Green Bay Lobe terminal moraines before 17.5 ka, based on the oldest calibrated minimum-limiting  $^{14}\text{C}$  age from Valders Quarry of  $17.7 \pm 0.2$  ka (Maher et al., 1998) (Fig. DR9).
- After this *a-priori* removal of outliers and because our data sets are normally distributed

based on the Shapiro-Wilks test, we use Chauvenet's statistical test to exclude ages that have a large deviation from the sample set mean compared with the standard deviation and accounting for the number of samples (Clark et al., 2009; Rinterknecht et al., 2006).

- We have identified 13 outliers that were removed before calculating site averages and standard errors. Eleven outliers were excluded by *a-priori* removal; two outliers were excluded based on Chauvenet's criterion.
- Outliers that are removed are shown in Fig. DR9.
- Because the scatter in ages for a given sample site is larger than the analytical uncertainty of each individual measurement, we calculate the straight mean and standard error of the mean as the best estimate of the true age of deglaciation and its geological uncertainty for sites CL, nGBL, sGBL, i-nGBL, and GM (Bevington and Robinson, 2002).
- For sites i-CL and i-sGBL, where we only have two samples per site, the difference between ages is equal to or smaller than the analytical uncertainty of each measurement. Therefore we present the error-weighted mean and uncertainty for these sites, as the standard error between the consistent ages does not provide an adequate representation of overall uncertainty (Bevington and Robinson, 2002).

### **Construction of time-distance diagrams**

- In Fig. 2 of the text, we construct time-distance diagrams for the Green Bay, Lake Michigan, and Miami-Scioto Lobes using the bracketing  $^{14}\text{C}$  ages on ice-margin advances and retreats. These diagrams have been previously published (see below).
- All radiocarbon ages discussed are calibrated using Calib 7.0 and IntCal13 (Stuiver and Reimer, 1993; Reimer et al., 2013).
- All information necessary to construct these diagrams is provided in Table DR2 and the respective publications.
- The Miami-Scioto Lobe time-distance curve (Fig. 2f) is an updated version of Eckberg et al. (1993), based on ages from Lowell et al. (1990), Dyke (2004) and Glover et al. (2011).
- The Lake Michigan Lobe time-distance curve (Fig. 2g) is an updated version of the Hansel and Johnson (1992) record from Curry and Petras (2011).
- The Green Bay Lobe time-distance curve (Fig. 2h) is from a combination of dates, and was recently summarized in Hooyer et al. (2007) (see Table DR2 for list of ages).
- In Fig. 2i, we draw a similar record of retreat for the northern Green Bay Lobe, constrained by the correlation of the ice margin positions (following Hooyer et al., 2007).
- Since chronological information for the Chippewa Lobe is limited prior to this study, we draw the time-distance diagram of Fig. 2j solely using our new  $^{10}\text{Be}$  chronology.

### **Surface mass balance modeling**

- To simulate the surface mass balance (SMB) of the southern LIS, we conducted paired simulations of a fully-coupled atmosphere-ocean general circulation model (GCM) (NASA GISS ModelE2-R; Schmidt et al., 2014) and a surface energy balance model (SEBM) (Anslow et al., 2008; Carlson et al., 2009).
- The paired GCM-SMB approach used here forces the SMB calculations with an equilibrium climate from the GCM, given a particular set of ice sheet and solar/greenhouse gas forcings.
- The current version of ModelE2-R has an atmosphere resolution of 2 degrees latitude by 2.5 degrees longitude with 40 vertical layers up to 0.1 mb and an ocean resolution of 1 degree latitude by 1.25 degrees longitude with 32 depth layers.
- We conducted three separate simulations at 24 ka, 21 ka, and 19 ka using the appropriate

insolation of each time period due to changes in orbital parameters (Berger and Loutre, 1991) (see Ullman et al., 2014). We also ran a simulation at 16.5 ka that included appropriate insolation forcing and atmospheric greenhouse gas concentrations.

- We employed the LGM global ice-sheet topography of ICE-5G (Peltier, 2004) but substituted an alternative reconstruction of the LIS over North America (Licciardi et al., 1998). At the LGM, the Laurentide Ice Sheet abutted the Cordilleran Ice Sheet to the west, and the interface between the Licciardi et al. (1998) reconstruction of the LIS and the ICE-5G reconstruction of the Cordilleran Ice Sheet leads to a discontinuity in ice elevation, as the Licciardi et al. (1998) reconstruction does not include ice-buttressing effects of the adjacent Cordilleran Ice Sheet. However, we focus our calculations of surface mass balance to the southern margin alone, away from this interface between ice sheet masses.
- The Licciardi et al. (1998) reconstruction is based on a flow-line model that simulates ice-sheet dynamics over deformable and rigid beds. The advantage of this reconstruction for this study is its ability to resolve the low elevation margins of the sLIS that agrees with observations of inferred topographic gradients along the southern margin (Clark, 1992). Due to these geologic constraints, the Licciardi et al. reconstruction may capture of the topographic gradient and resolution of the equilibrium line altitude close to the ice margin better than other reconstructions (e.g., Fig. DR10) (Peltier, 2004; Clark et al., 1996; Licciardi et al., 1998; Tarasov and Peltier, 2004; Argus and Peltier, 2010; Lambeck et al., 2010; Tarasov et al., 2012).
- The Licciardi et al. (1998) model does not include the divergence of ice along flowlines with transverse spread. This limitation may result in greater ice elevations relative to regions with radial spreading centers, but such spreading centers are well above the equilibrium line altitude of the model and the inferred elevation bias may have little effect on surface mass balance for the sLIS.
- Each time slice SMB simulation was forced by temporally interpolated, daily climatologies of relevant parameters (surface air temperature, precipitation, wind speed, relative humidity, and surface radiation fluxes), which were calculated using the final 100 years of equilibrium GCM output.
- For the downscaling of relatively coarse-resolution GCM output (2 x 2.5 degree) to the higher-resolution (50 km) ice sheet topography of Licciardi et al. (1998), we use a temperature lapse rate of 5 °C km<sup>-1</sup> and a precipitation lapse scaling of 0.1 km<sup>-1</sup>, following Carlson et al. (2009; 2012), and suggested by previous climate reconstructions above ice sheets (Pollard et al., 2000; Marshall et al., 2002; Abe-Ouchi et al., 2007). Since we fix these lapse rates across each of the time slice simulations, varying them within the range of other lapse estimates does not significantly impact our resulting mass balance anomalies from the 24 ka results.
- We performed sensitivity tests and found that since the elevation distance is typically small between the GCM and SMB model grids; varying the parameters has a minimal effect on absolute surface mass balance that is well within the range of balances that arise from the changes in surface roughness and albedo decay. Testing at differing resolutions at and below 50 km x 50 km did not impact the model surface mass balance anomalies (Carlson et al., 2009).
- We use snow/ice roughness and albedo decay rate parameters that match average modern observations from the Greenland and Antarctic Ice Sheets (Carlson et al., 2009; Grainger and Lister, 1966; Duynkerke and van den Broeke, 1994; Greuell and Konzelmann, 1994; Smeets and van den Broeke, 2008).
- Because we are interested in the effects that changes in radiative forcing from Earth's orbit and greenhouse gases have on the southern LIS SMB, we only look at the change in SMB relative to the 24 ka simulation (Fig. DR10).



- The 16.5 ka simulation are the results of a hybrid SMB simulation, which uses a 16.5 ka GCM climate forcing downscaled and applied to the LGM (21 ka) ice-sheet topography. In the GCM resolution, the differences between 21 and 16.5 ka ice sheets are small (both in extent and ice sheet elevation), so the downscaling to the higher resolution ice sheet topography is similar to the straight LGM (24-19 ka) downscaling.
- Total surface mass balance across the southern LIS is negative and decreasing with increasing insolation forcing:  $-330 \text{ Gt yr}^{-1}$  (24 ka),  $-540 \text{ Gt yr}^{-1}$  (21 ka),  $-690 \text{ Gt yr}^{-1}$  (19 ka). The 16.5 ka forcing with increases in both insolation and greenhouse gas forcing results in a southern LIS surface mass balance of  $-1320 \text{ Gt yr}^{-1}$  (Fig. DR12). We focus the results as anomalies in the main text so as to minimize uncertainty that may be inherent to our model design.

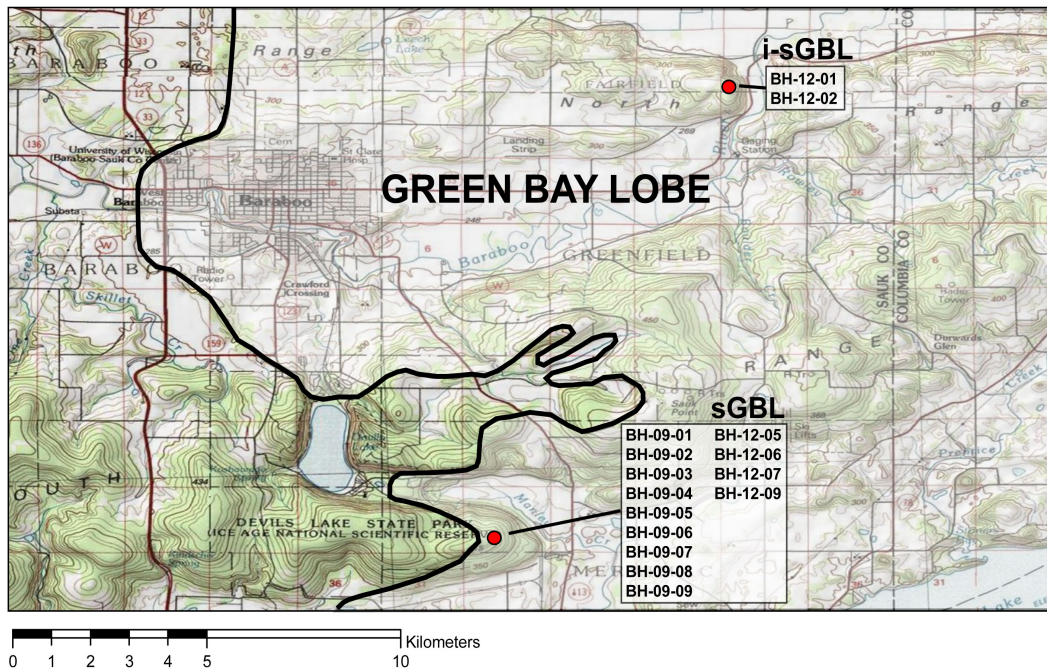

Fig. DR1. Topographic map of the sGBL and i-sGBL sampling locations and the samples collected at each site (shown as red circles). Extent of LGM ice is shaded in white, with a rough outline of the terminal moraine drawn with the heavy black line. Underlying topographic map provided by the USGS and the National Geographic Society (© 2011).

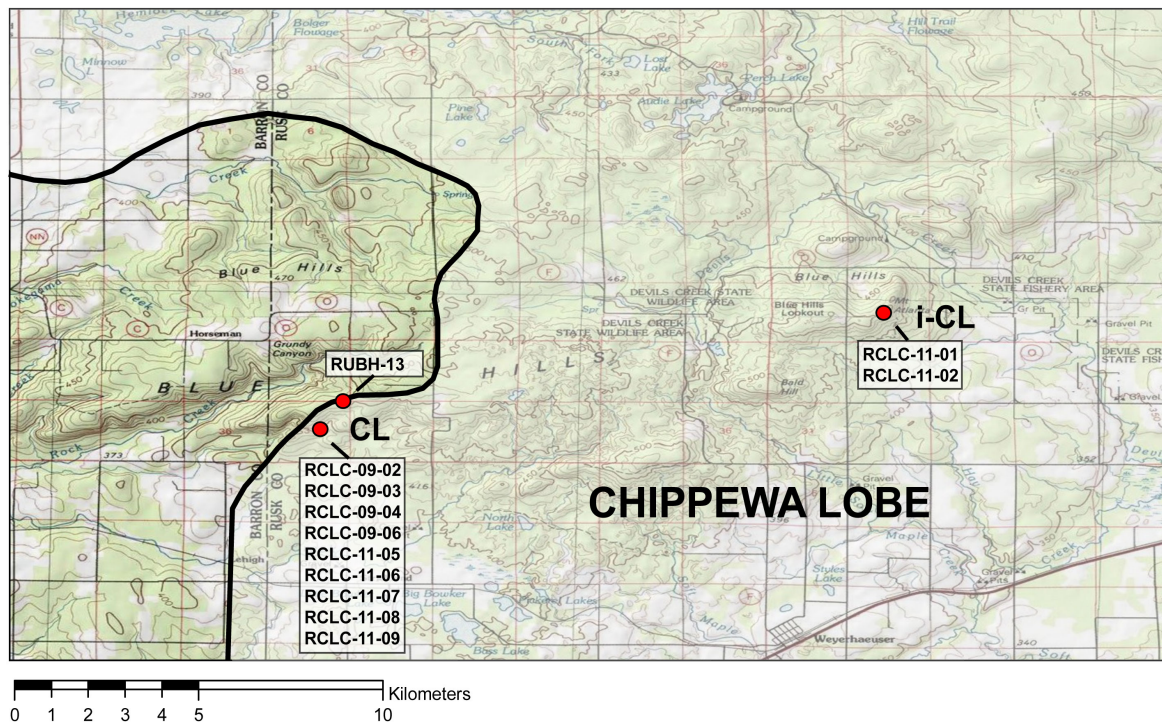

Fig. DR2. Topographic map of the CL and i-CL sampling locations and the samples collected at each site (shown as red circles). Extent of LGM extent of the Chippewa Lobe is shaded in white, with a rough outline of the terminal moraine drawn with the heavy black line. Underlying topographic map provided by the USGS and the National Geographic Society (© 2011).



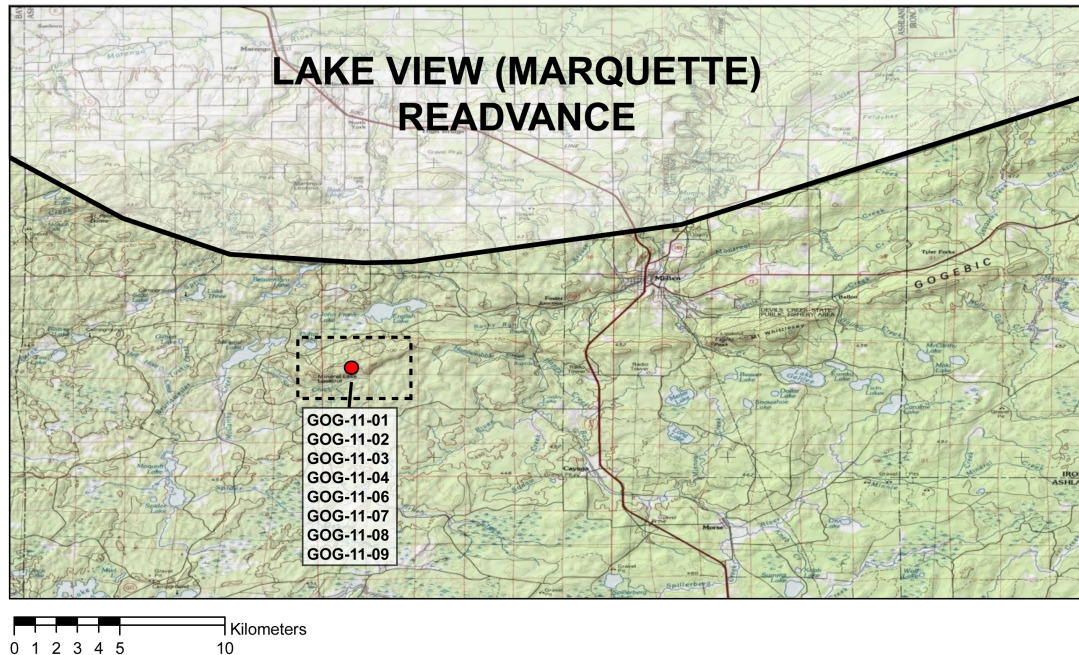

Fig. DR3. Regional topographic map of the GM sampling location and the samples collected at the site (shown as red circle). The parallel ridgelines of the Gogebic Range can be seen in eastern portion of the map. The sampling location is on one of the westernmost bedrock arms of this range. The rough extent of the Lake View Phase ice margin is shaded in white. This readvance occurred during Younger Dryas cold interval and is correlative with the Marquette Phase to the east (Lowell et al., 1999a). There is no evidence to suggest that this readvance overtopped the Gogebic Range. Region displayed in Fig. DR4 denoted by the black dashed box. Underlying topographic map provided by the USGS and the National Geographic Society (© 2011).

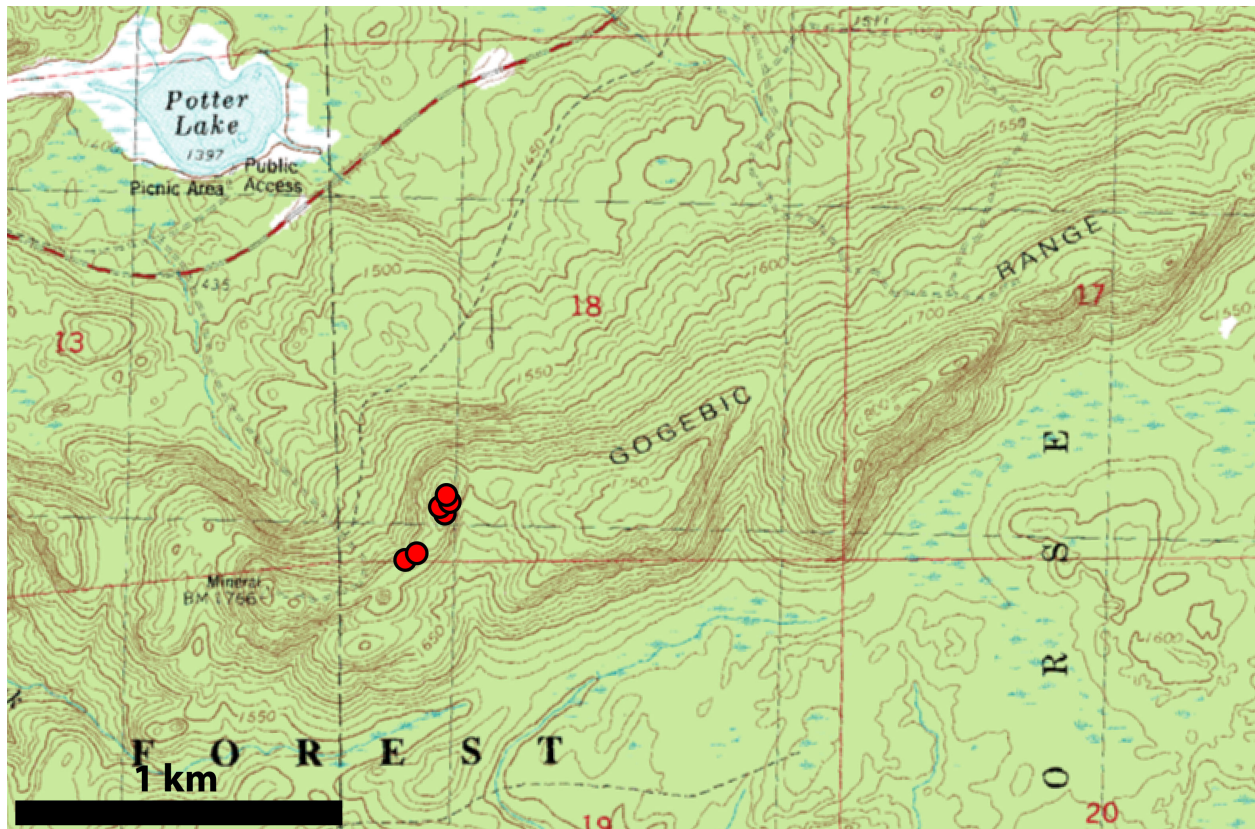

Fig. DR4. Map of topography immediately surrounding GM sampling sites (red circles). Underlying topographic map (1:24,000 scale, 10 foot contour interval) provided by the USGS and the National Geographic Society (© 2011).



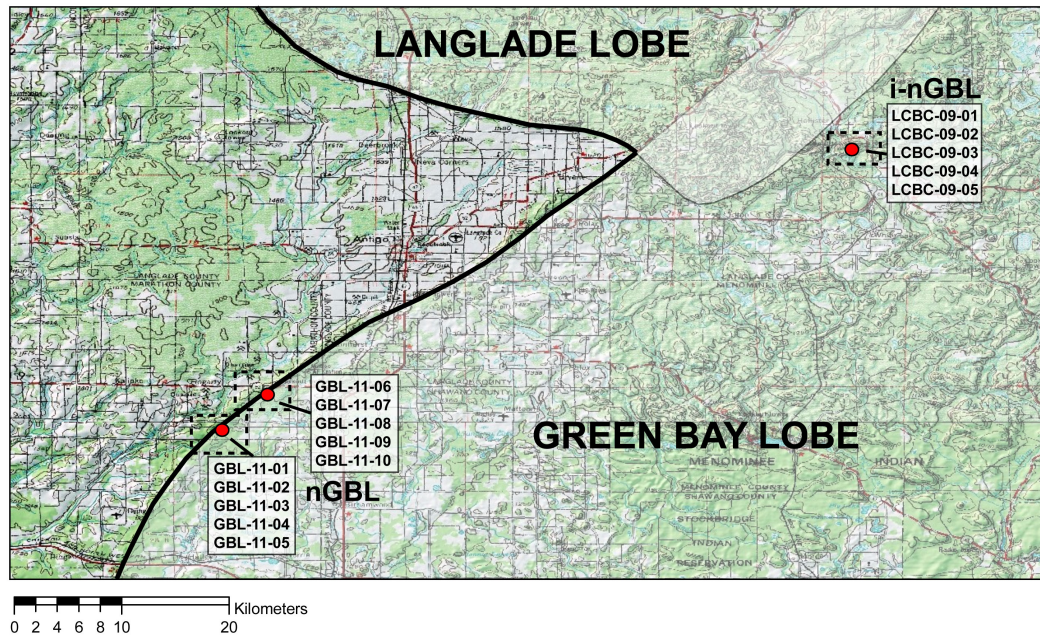

Fig. DR5. Regional topographic map of the nGBL and i-nGBL (LCBC) sampling locations and the samples collected at each site (shown as red circles). This map shows the confluence of the Langlade and Green Bay Lobes shaded in white, with their outer LGM extents drawn with the heavy black line. Regions displayed in Fig. DR6-DR8 denoted by the black dashed boxes. Underlying topographic map provided by the USGS and the National Geographic Society (© 2011).

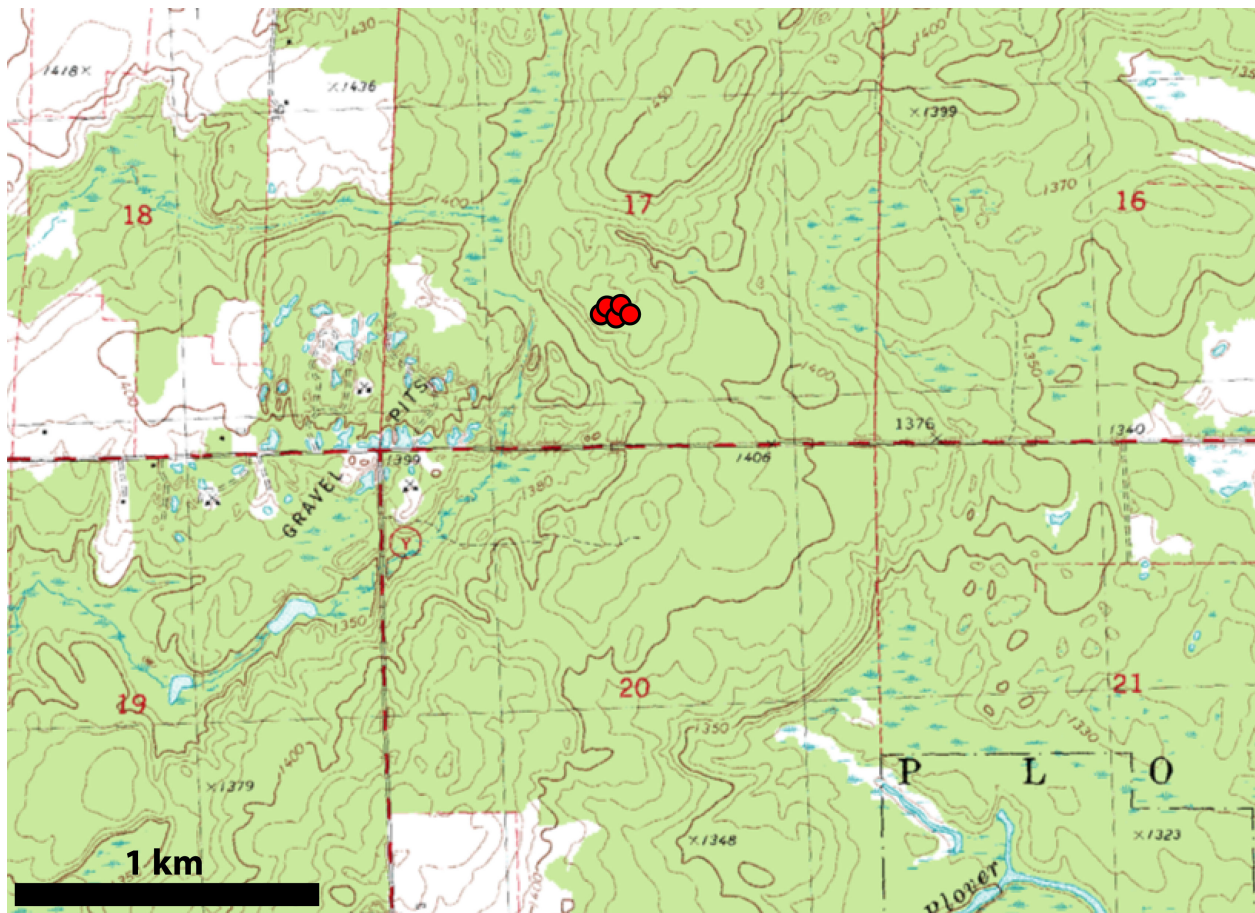

Fig. DR6. Map of topography immediately surrounding sampling sites GBL-11-01 through GBL-11-05 (red circles). Ice-collapse features are evidence along this moraine, but the sampling sites come from a stable and flat topographic high away from hummocky terrain. Underlying topographic map (1:24,000 scale, 10 foot contour interval) provided by the USGS and the National Geographic Society (© 2011).



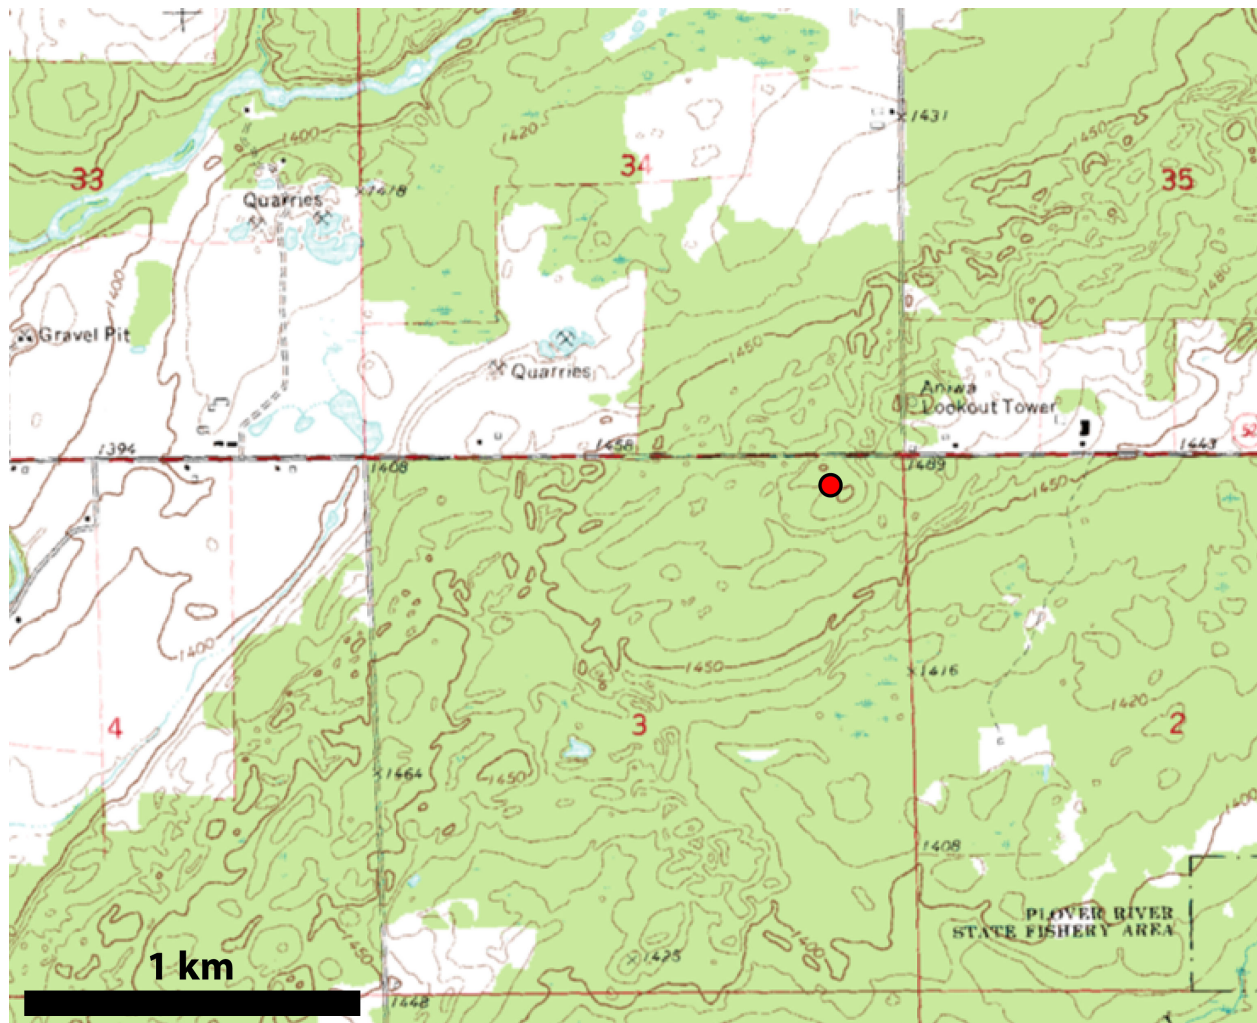

Fig. DR7. Map of topography immediately surrounding sampling sites GBL-11-06 through GBL-11-10 (red circle). The prominent terminal moraine of this site can be seen running from the southwest to northeast corners of this map, with the flatter outwash plain evident in the northwest corner. The sampling sites come from a stable and flat topographic high away from some of the collapsed features on this moraine. Underlying topographic map (1:24,000 scale, 10 foot contour interval) provided by the USGS and the National Geographic Society (© 2011).

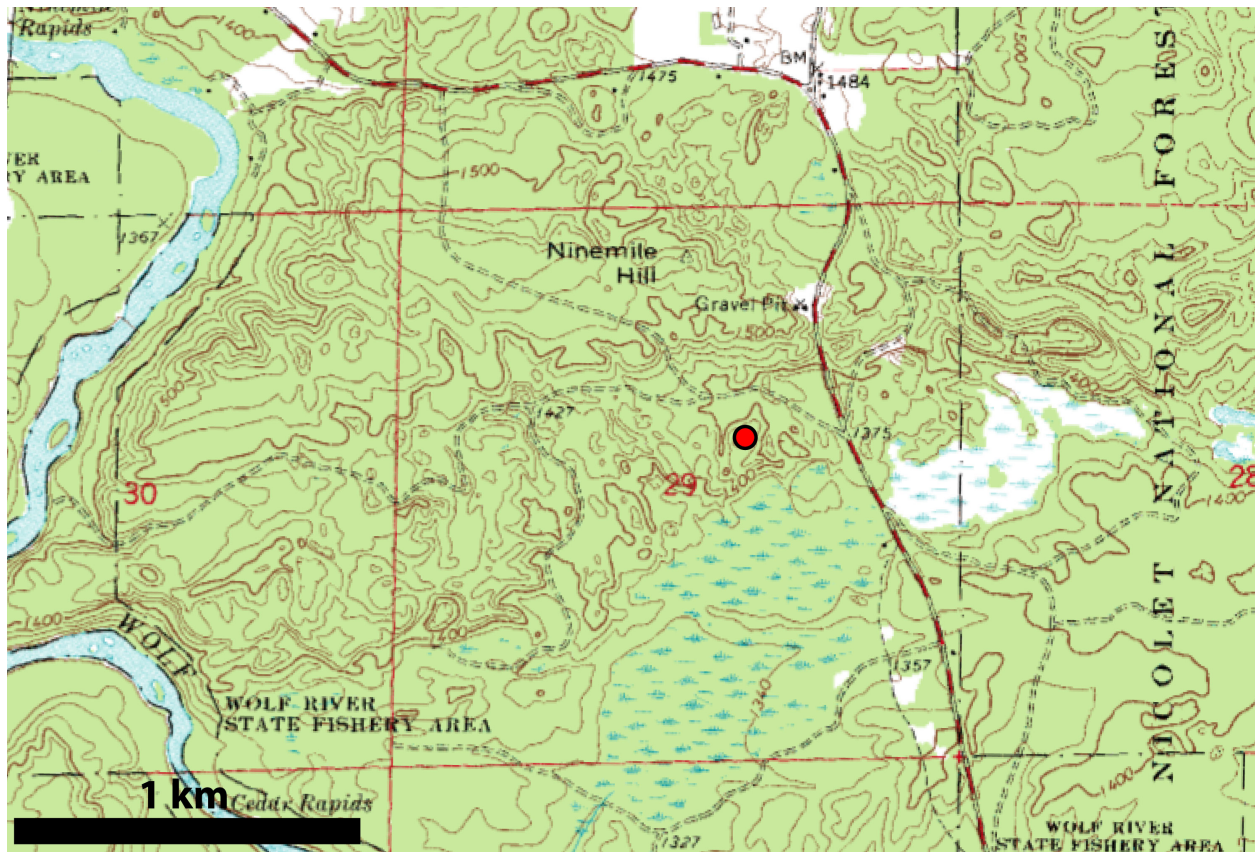

Fig. DR8. Map of topography immediately surrounding i-nGBL sampling sites (red circle). Underlying topographic map (1:24,000 scale, 10 foot contour interval) provided by the USGS and the National Geographic Society (© 2011).

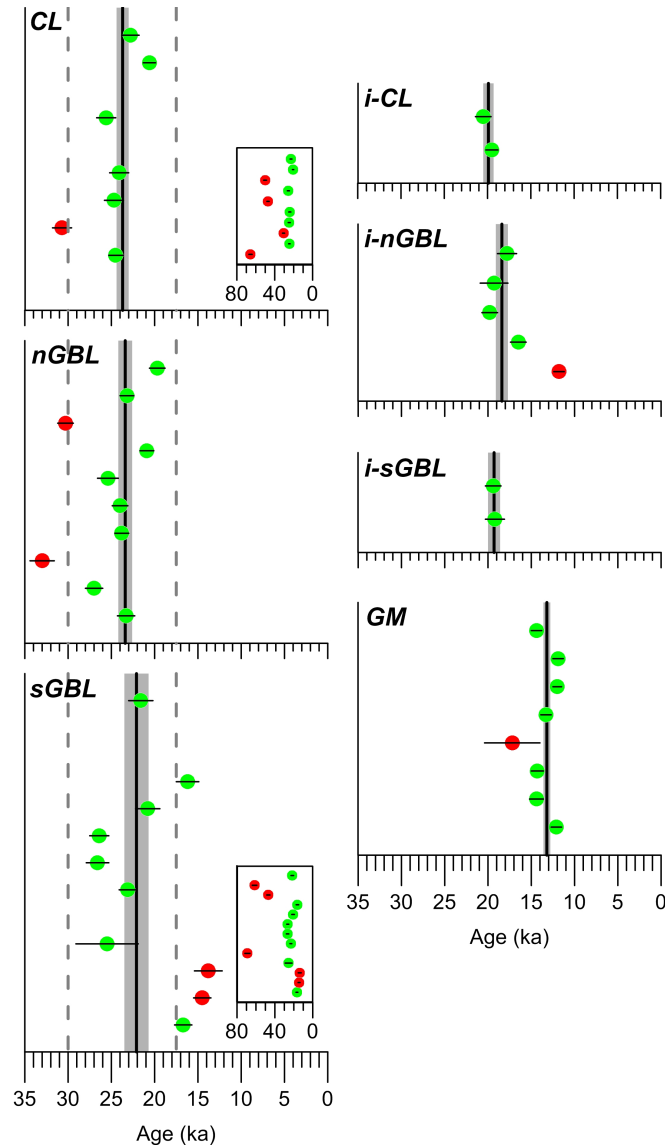

Fig. DR9. Individual  $^{10}\text{Be}$  exposure ages for each of the sampling sites (denoted in upper left corner of each plot). Green symbols indicate ages used in site age calculation, and red symbols indicate outliers not included in the site age. Error bars for each age are  $1\sigma$  analytical uncertainty. Vertical black lines show mean age for each site with shaded gray bars indicating the  $1\sigma$  uncertainty range (standard error of the mean or error-weighted sigma for sites i-CL and i-sGBL). For CL and sGBL, inset plot with expanded age axis shows older outliers. Dashed grey lines indicate *a priori*  $^{14}\text{C}$  constraints on initial ice retreat.

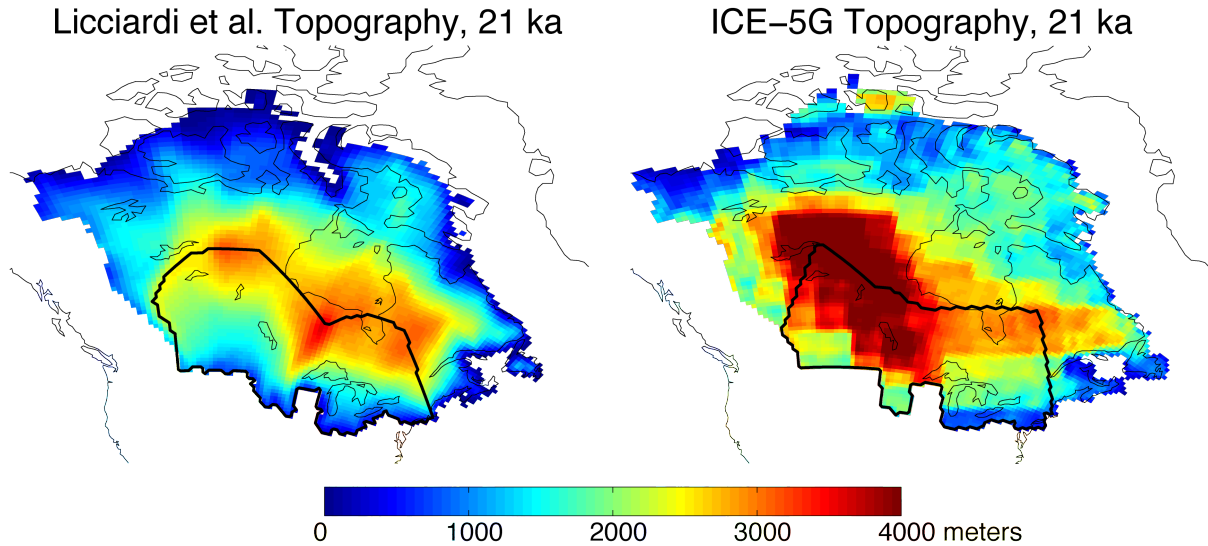

Fig. DR10. Comparison of the LIS topographies in the reconstruction used in our surface mass balance simulations (left; Licciardi et al., 1998) and the ICE-5G reconstruction (right; Peltier, 2004). Units are meters above 21 ka sea level. The region outlined in black indicates the area used to calculate the region-specific surface mass balance for the sLIS. This region is separated from the rest of the LIS using topographic ice drainage divides from the reconstruction. Because we focus only on the sLIS, we restrict our surface mass balance analysis to the two southernmost regions from the James Lobe to New England. Note: ICE-5G was not used in the analysis for this paper because it does not adequately resolve the low-elevation margins along the sLIS.

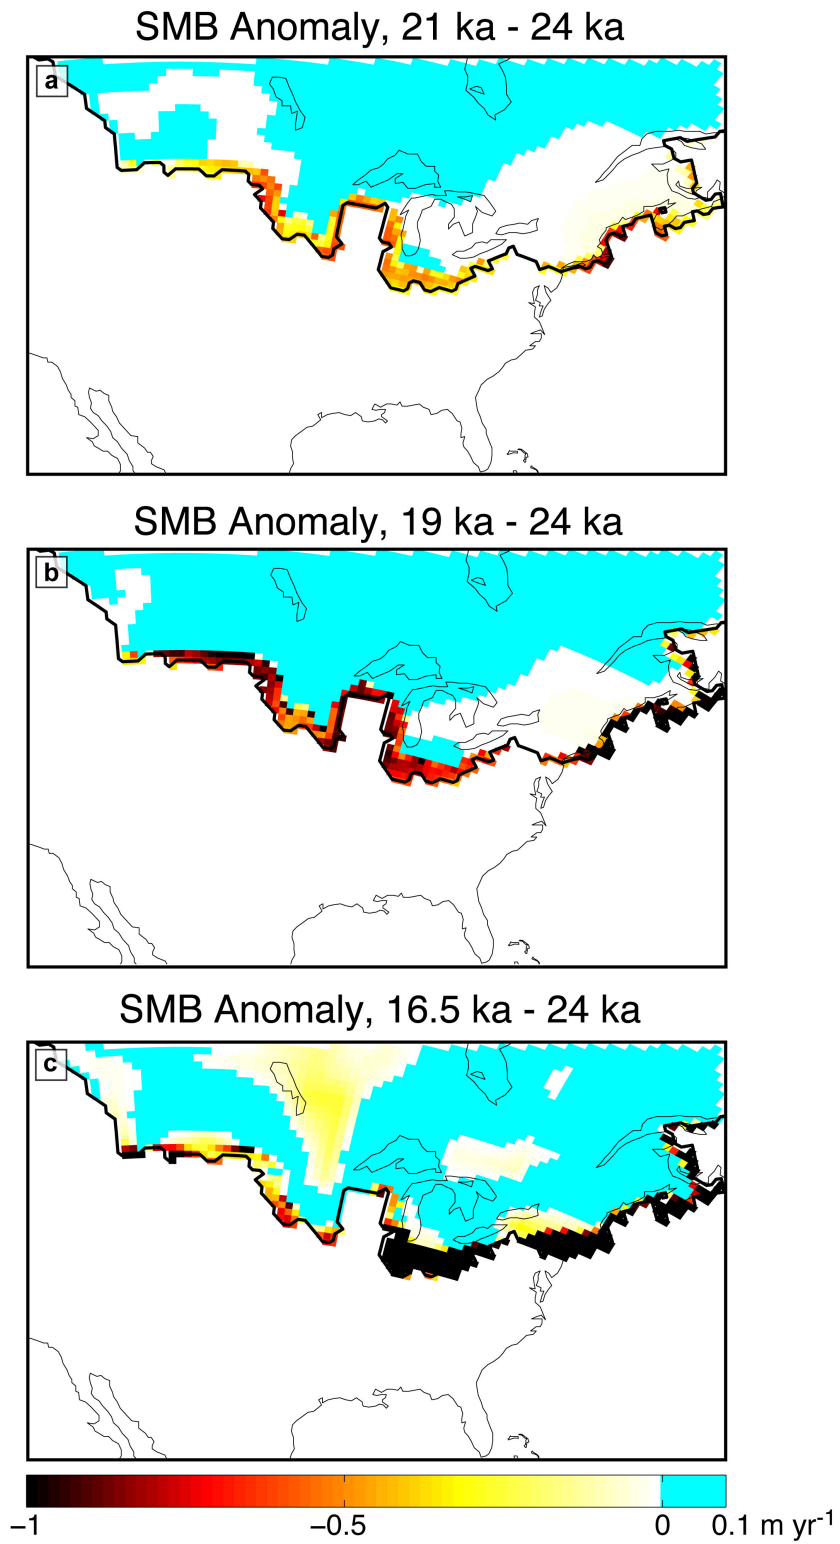

Fig. DR11. Modeled surface mass balance (SMB; units of meters water equivalent per year) anomalies relative to 24 ka at (a) 21 ka, (b) 19 ka, and (c) 16.5 ka.



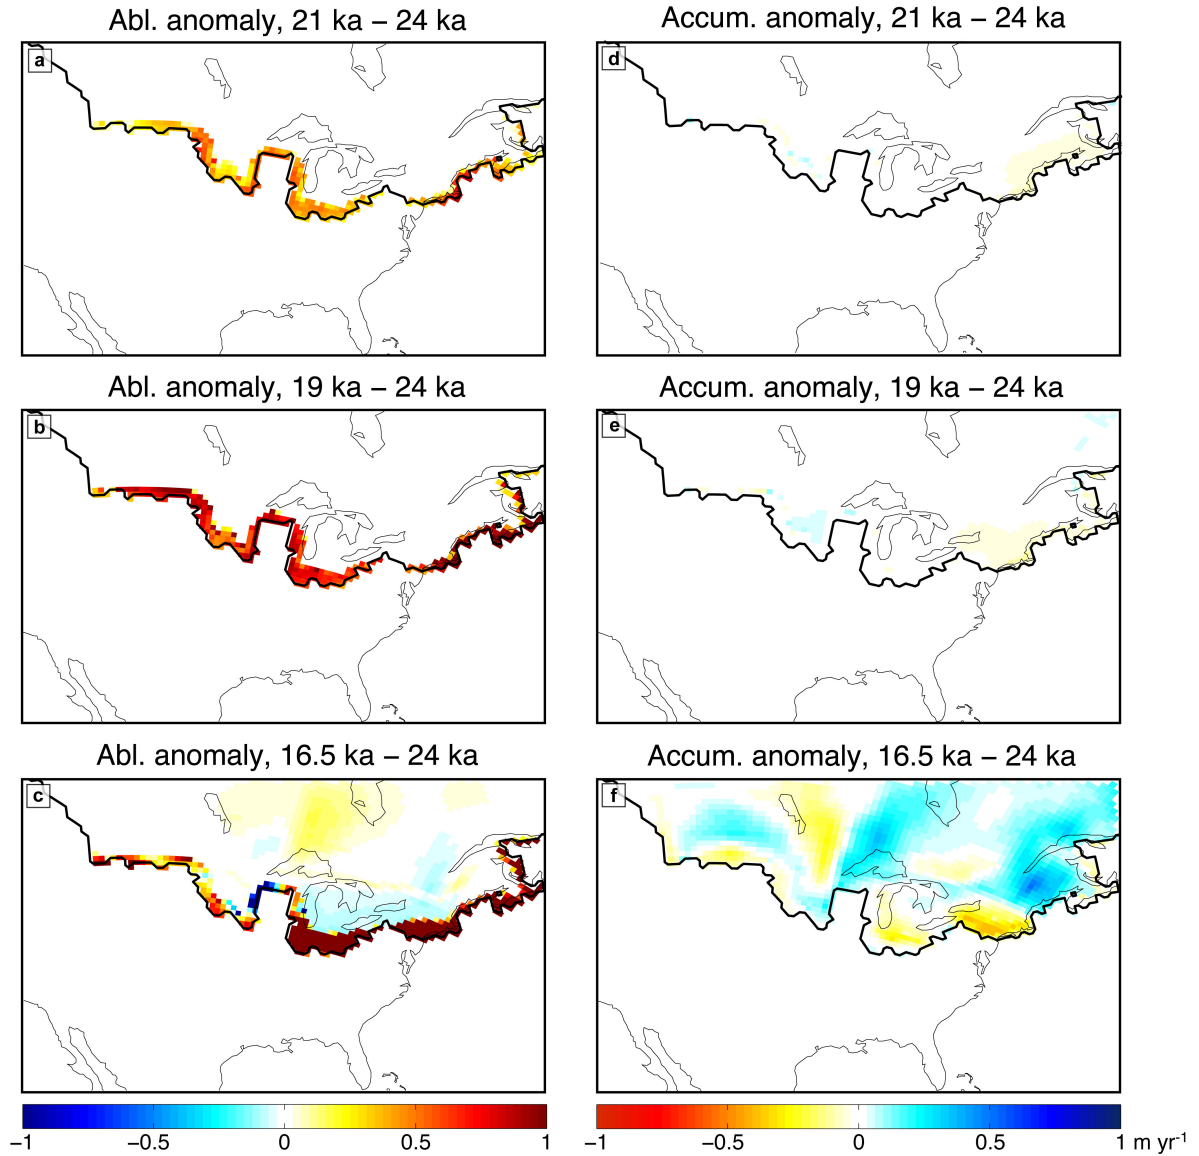

Fig. DR12. Ablation and accumulation anomalies for each of the SEBM simulations relative to 24 ka (units of meters water equivalent per year). (a) 21 ka ablation anomaly, (b) 19 ka ablation anomaly (c) 16.5 ka ablation anomaly, (d) 21 ka accumulation anomaly, (e) 19 ka accumulation anomaly (f) 16.5 ka accumulation anomaly.

**Table DR1a.** Cosmogenic sample information.

| Sample      | Latitude<br>(DD) | Longitude<br>(DD) | Modern<br>Elevation<br>(m asl) | Sample<br>Lithology <sup>a</sup> | Thickness<br>(cm) | Quartz<br>(g) | Be<br>Standard<br>Used | AMS<br><sup>10</sup> Be/ <sup>9</sup> Be<br>ratio (10 <sup>-15</sup> ) <sup>b</sup> | AMS<br>Uncertainty<br>(10 <sup>-15</sup> ) <sup>c</sup> | <sup>10</sup> Be<br>(atoms g <sup>-1</sup> ) <sup>d</sup> | Uncertainty<br>(atoms g <sup>-1</sup> ) | <sup>10</sup> Be age<br>(ka) <sup>e</sup> |
|-------------|------------------|-------------------|--------------------------------|----------------------------------|-------------------|---------------|------------------------|-------------------------------------------------------------------------------------|---------------------------------------------------------|-----------------------------------------------------------|-----------------------------------------|-------------------------------------------|
| <b>CL</b>   |                  |                   |                                |                                  |                   |               |                        |                                                                                     |                                                         |                                                           |                                         |                                           |
| RCLC-09-02  | 45.469           | -91.535           | 449                            | granite                          | 3.0               | 41.626        | Charitas               | 178.7                                                                               | 6.8                                                     | 134339                                                    | 5706                                    | 22.8 ± 1.0                                |
| RCLC-09-03  | 45.469           | -91.534           | 449                            | granite                          | 3.5               | 51.729        | Charitas               | 200.1                                                                               | 6.0                                                     | 120686                                                    | 4087                                    | 20.6 ± 0.7                                |
| RCLC-09-04  | 45.470           | -91.534           | 440                            | quartzite                        | 2.0               | 45.557        | Charitas               | 412.8                                                                               | 10.7                                                    | 296900                                                    | 8522                                    | 50.2 ± 1.5                                |
| RCLC-09-06  | 45.472           | -91.531           | 461                            | granite                          | 3.0               | 49.429        | Charitas               | 236.3                                                                               | 9.2                                                     | 152771                                                    | 6527                                    | 25.6 ± 1.1                                |
| RCLC-09-13  | 45.480           | -91.525           | 505                            | quartzite                        | 2.0               | 48.448        | Charitas               | 435.0                                                                               | 9.0                                                     | 295706                                                    | 7018                                    | 47.1 ± 1.2                                |
| RCLC-11-05  | 45.472           | -91.534           | 444                            | granite                          | 3.0               | 29.893        | OSU Blue               | 255.0                                                                               | 11.0                                                    | 141309                                                    | 6309                                    | 24.1 ± 1.1                                |
| RCLC-11-06  | 45.471           | -91.531           | 410                            | granite                          | 2.5               | 29.922        | OSU Blue               | 255.0                                                                               | 11.0                                                    | 141035                                                    | 6297                                    | 24.7 ± 1.1                                |
| RCLC-11-07  | 45.471           | -91.532           | 432                            | granite                          | 2.5               | 30.111        | OSU Blue               | 326.0                                                                               | 11.0                                                    | 179304                                                    | 6352                                    | 30.7 ± 1.1                                |
| RCLC-11-08  | 45.472           | -91.531           | 428                            | granite                          | 3.0               | 22.242        | OSU Blue               | 191.0                                                                               | 6.0                                                     | 141880                                                    | 4733                                    | 24.6 ± 0.8                                |
| RCLC-11-09  | 45.472           | -91.530           | 439                            | granite                          | 2.0               | 21.188        | OSU Blue               | 491.0                                                                               | 11.0                                                    | 385319                                                    | 9495                                    | 65.6 ± 1.7                                |
| <b>I-CL</b> |                  |                   |                                |                                  |                   |               |                        |                                                                                     |                                                         |                                                           |                                         |                                           |
| RCLC-11-01  | 45.504           | -91.388           | 514                            | granite                          | 3.0               | 29.421        | OSU Blue               | 229.0                                                                               | 10.0                                                    | 127824                                                    | 5780                                    | 20.5 ± 0.9                                |
| RCLC-11-02  | 45.503           | -91.388           | 482                            | granite                          | 2.5               | 29.909        | OSU Blue               | 214.0                                                                               | 7.0                                                     | 118463                                                    | 4094                                    | 19.5 ± 0.7                                |
| <b>GM</b>   |                  |                   |                                |                                  |                   |               |                        |                                                                                     |                                                         |                                                           |                                         |                                           |
| GOG-11-01   | 46.286           | -90.794           | 507                            | granite                          | 2.0               | 21.692        | OSU Blue               | 119.0                                                                               | 5.0                                                     | 90064                                                     | 3964                                    | 14.4 ± 0.6                                |
| GOG-11-02   | 46.286           | -90.794           | 538                            | granite                          | 2.5               | 22.106        | OSU Blue               | 103.0                                                                               | 5.0                                                     | 76293                                                     | 3864                                    | 11.9 ± 0.6                                |
| GOG-11-03   | 46.286           | -90.794           | 538                            | granite                          | 1.5               | 22.516        | OSU Blue               | 107.0                                                                               | 4.0                                                     | 77794                                                     | 3078                                    | 12.1 ± 0.5                                |
| GOG-11-04   | 46.286           | -90.794           | 531                            | granite                          | 2.5               | 24.900        | OSU Blue               | 128.0                                                                               | 6.0                                                     | 84574                                                     | 4124                                    | 13.3 ± 0.6                                |
| GOG-11-06   | 46.286           | -90.794           | 518                            | granite                          | 2.0               | 21.764        | OSU Blue               | 144.0                                                                               | 26.0                                                    | 108943                                                    | 19976                                   | 17.2 ± 3.2                                |
| GOG-11-07   | 46.285           | -90.795           | 522                            | granite                          | 2.5               | 22.392        | OSU Blue               | 123.0                                                                               | 6.0                                                     | 90230                                                     | 4574                                    | 14.3 ± 0.7                                |
| GOG-11-08   | 46.285           | -90.795           | 524                            | granite                          | 2.0               | 24.394        | OSU Blue               | 135.0                                                                               | 7.0                                                     | 91213                                                     | 4894                                    | 14.4 ± 0.8                                |
| GOG-11-09   | 46.285           | -90.795           | 527                            | granite                          | 1.0               | 24.785        | OSU Blue               | 117.0                                                                               | 6.0                                                     | 77550                                                     | 4128                                    | 12.1 ± 0.6                                |
| <b>nGBL</b> |                  |                   |                                |                                  |                   |               |                        |                                                                                     |                                                         |                                                           |                                         |                                           |
| GBL-11-01   | 44.990           | -89.316           | 447                            | granite                          | 1.5               | 29.944        | OSU Blue               | 356.0                                                                               | 14.0                                                    | 196807                                                    | 8033                                    | 33.1 ± 1.4                                |
| GBL-11-02   | 44.990           | -89.316           | 445                            | granite                          | 4.0               | 30.102        | OSU Blue               | 245.0                                                                               | 8.0                                                     | 134390                                                    | 4631                                    | 23.2 ± 0.8                                |
| GBL-11-03   | 44.990           | -89.317           | 436                            | granite                          | 2.0               | 21.007        | OSU Blue               | 226.0                                                                               | 6.0                                                     | 178036                                                    | 5103                                    | 30.3 ± 0.9                                |
| GBL-11-04   | 44.990           | -89.316           | 438                            | granite                          | 2.0               | 21.916        | OSU Blue               | 162.0                                                                               | 6.0                                                     | 121899                                                    | 4741                                    | 20.9 ± 0.8                                |
| GBL-11-05   | 44.990           | -89.316           | 438                            | granite                          | 1.5               | 29.958        | OSU Blue               | 271.0                                                                               | 12.0                                                    | 149339                                                    | 6832                                    | 25.4 ± 1.2                                |
| GBL-11-06   | 45.029           | -89.269           | 465                            | granite                          | 3.0               | 30.077        | OSU Blue               | 260.0                                                                               | 9.0                                                     | 143081                                                    | 5198                                    | 24.0 ± 0.9                                |
| GBL-11-07   | 45.029           | -89.269           | 465                            | granite                          | 2.5               | 30.466        | OSU Blue               | 262.0                                                                               | 8.0                                                     | 141980                                                    | 4600                                    | 23.8 ± 0.8                                |
| GBL-11-08   | 45.029           | -89.269           | 465                            | granite                          | 1.5               | 29.916        | OSU Blue               | 215.0                                                                               | 9.0                                                     | 118532                                                    | 5152                                    | 19.7 ± 0.9                                |
| GBL-11-09   | 45.029           | -89.269           | 465                            | granite                          | 3.0               | 21.894        | OSU Blue               | 213.0                                                                               | 7.0                                                     | 160754                                                    | 5580                                    | 27.0 ± 1.0                                |
| GBL-11-10   | 45.029           | -89.269           | 465                            | granite                          | 2.5               | 23.549        | OSU Blue               | 198.0                                                                               | 8.0                                                     | 138833                                                    | 5842                                    | 23.3 ± 1.0                                |

<sup>a</sup>All age calculations assume a density of 2.65 g cm<sup>-3</sup> for granite and sandstone, 2.75 g cm<sup>-3</sup> for quartzite.<sup>b</sup>All AMS measurements are standardized to 07KNSSTD.<sup>c</sup>1-sigma AMS uncertainty<sup>d</sup><sup>10</sup>Be atom concentrations are blank-corrected (see text).<sup>e</sup>All age calculations use standard atmosphere, modern elevation, and zero erosion. No shielding correction necessary.<sup>10</sup>Be ages are presented with 1-sigma analytical uncertainty.Ages were calculated using the CRONUS Earth online calculator<sup>(v 2.2)</sup> with the NENA production rate and the Lal/Stone time-dependent scaling scheme (see text).



**Table DR1b.** Cosmogenic sample information (continued).

| Sample        | Latitude<br>(DD) | Longitude<br>(DD) | Modern<br>Elevation<br>(m asl) | Sample<br>Lithology <sup>a</sup> | Thickness<br>(cm) | Quartz<br>(g) | Be<br>Standard<br>Used | AMS<br><sup>10</sup> Be/ <sup>9</sup> Be<br>ratio (10 <sup>-15</sup> ) <sup>b</sup> | AMS<br>Uncertainty<br>(10 <sup>-15</sup> ) <sup>c</sup> | <sup>10</sup> Be<br>(atoms g <sup>-1</sup> ) <sup>d</sup> | Uncertainty<br>(atoms g <sup>-1</sup> ) | <sup>10</sup> Be age<br>(ka) <sup>e</sup> |
|---------------|------------------|-------------------|--------------------------------|----------------------------------|-------------------|---------------|------------------------|-------------------------------------------------------------------------------------|---------------------------------------------------------|-----------------------------------------------------------|-----------------------------------------|-------------------------------------------|
| <b>i-GBL</b>  |                  |                   |                                |                                  |                   |               |                        |                                                                                     |                                                         |                                                           |                                         |                                           |
| LCBC-11-01    | 45.227           | -88.768           | 412                            | granite                          | 2.0               | 35.844        | Merck                  | 124.9                                                                               | 7.0                                                     | 102066                                                    | 6019                                    | 17.9 ± 1.1                                |
| LCBC-11-02    | 45.227           | -88.768           | 408                            | granite                          | 2.0               | 38.394        | Merck                  | 128.5                                                                               | 10.4                                                    | 109884                                                    | 9181                                    | 19.3 ± 1.6                                |
| LCBC-11-03    | 45.227           | -88.768           | 417                            | granite                          | 1.5               | 38.471        | Merck                  | 134.0                                                                               | 5.6                                                     | 114498                                                    | 5020                                    | 19.9 ± 0.9                                |
| LCBC-11-04    | 45.227           | -88.769           | 430                            | granite                          | 2.0               | 38.069        | Merck                  | 110.2                                                                               | 5.4                                                     | 95591                                                     | 4981                                    | 16.5 ± 0.9                                |
| LCBC-11-05    | 45.227           | -88.769           | 375                            | granite                          | 2.0               | 39.342        | Merck                  | 78.4                                                                                | 3.7                                                     | 65205                                                     | 3306                                    | 11.8 ± 0.6                                |
| <b>sGBL</b>   |                  |                   |                                |                                  |                   |               |                        |                                                                                     |                                                         |                                                           |                                         |                                           |
| BH-09-01      | 43.398           | -89.692           | 397                            | granite                          | 2.0               | 40.278        | Clartias               | 154.1                                                                               | 9.1                                                     | 119507                                                    | 7840                                    | 21.6 ± 1.4                                |
| BH-09-02      | 43.397           | -89.692           | 419                            | quartzite                        | 4.0               | 38.344        | Merck                  | 396.5                                                                               | 14.4                                                    | 342928                                                    | 13020                                   | 61.5 ± 2.4                                |
| BH-09-03      | 43.397           | -89.692           | 411                            | sandstone                        | 4.0               | 39.051        | Merck                  | 310.0                                                                               | 10.1                                                    | 262284                                                    | 9045                                    | 46.9 ± 1.7                                |
| BH-09-04      | 43.398           | -89.693           | 427                            | granite                          | 2.0               | 39.195        | Merck                  | 111.2                                                                               | 8.7                                                     | 91498                                                     | 7502                                    | 16.2 ± 1.3                                |
| BH-09-05      | 43.398           | -89.693           | 431                            | granite                          | 3.0               | 40.838        | Clartias               | 153.9                                                                               | 9.3                                                     | 117868                                                    | 7871                                    | 20.9 ± 1.4                                |
| BH-09-06      | 43.398           | -89.694           | 425                            | quartzite                        | 3.0               | 40.023        | Clartias               | 187.8                                                                               | 7.0                                                     | 149105                                                    | 6170                                    | 26.4 ± 1.1                                |
| BH-09-07      | 43.398           | -89.695           | 425                            | sandstone                        | 2.0               | 40.008        | Clartias               | 190.5                                                                               | 8.2                                                     | 151706                                                    | 7226                                    | 26.7 ± 1.3                                |
| BH-09-08      | 43.399           | -89.694           | 424                            | sandstone                        | 4.0               | 44.319        | Clartias               | 181.3                                                                               | 6.9                                                     | 129017                                                    | 5504                                    | 23.1 ± 1.0                                |
| BH-09-09      | 43.400           | -89.692           | 404                            | quartzite                        | 5.0               | 39.104        | Merck                  | 446.5                                                                               | 15.7                                                    | 376692                                                    | 13868                                   | 69.0 ± 2.7                                |
| BH-12-05      | 43.398           | -89.686           | 363                            | granite                          | 2.0               | 25.280        | OSU Blue               | 113.0                                                                               | 13.0                                                    | 73741                                                     | 8670                                    | 13.8 ± 1.6                                |
| BH-12-06      | 43.397           | -89.686           | 371                            | granite                          | 2.3               | 24.862        | OSU Blue               | 118.0                                                                               | 8.0                                                     | 77596                                                     | 5414                                    | 14.4 ± 1.0                                |
| BH-12-07      | 43.397           | -89.686           | 364                            | granite                          | 2.3               | 24.693        | OSU Blue               | 133.0                                                                               | 8.0                                                     | 89353                                                     | 5535                                    | 16.7 ± 1.0                                |
| BH-12-09      | 43.397           | -89.690           | 405                            | granite                          | 2.0               | 25.269        | OSU Blue               | 220.0                                                                               | 30.0                                                    | 142500                                                    | 19665                                   | 25.5 ± 3.6                                |
| <b>i-sGBL</b> |                  |                   |                                |                                  |                   |               |                        |                                                                                     |                                                         |                                                           |                                         |                                           |
| BH-12-01      | 43.498           | -89.637           | 366                            | granite                          | 2.0               | 24.698        | OSU Blue               | 158.0                                                                               | 7.0                                                     | 104533                                                    | 4814                                    | 19.4 ± 0.9                                |
| BH-12-02      | 43.501           | -89.640           | 336                            | granite                          | 1.3               | 24.337        | OSU Blue               | 151.0                                                                               | 8.0                                                     | 101423                                                    | 5547                                    | 19.3 ± 1.1                                |

<sup>a</sup>All age calculations assume a density of 2.65 g cm<sup>-3</sup> for granite and sandstone, 2.75 g cm<sup>-3</sup> for quartzite.<sup>b</sup>All AMS measurements are standardized to 07KNSTD.<sup>c</sup>1-sigma AMS uncertainty<sup>d</sup><sup>10</sup>Be atom concentrations are blank-corrected (see text).<sup>e</sup>All age calculations use standard atmosphere, modern elevation, and zero erosion. No shielding correction necessary.<sup>10</sup>Be ages are presented with 1-sigma analytical uncertainty.

Ages were calculated using the CRONUS Earth online calculator(v 2.2) with the NENA production rate and the Lal/Stone time-dependent scaling scheme (see text).

**Table DR2.** Radiocarbon and calibrated ages used in construction of time-distance diagrams in Fig. 2 (main text).

|                         | Sample ID     | Radiocarbon Age<br>( <sup>14</sup> C years BP) | 1 sigma error<br>( <sup>14</sup> C years) | Calibrated min*<br>(cal. years BP) | Calibrated Max*<br>(cal. years BP) | Median Calendar Age<br>(cal. years BP) | 1 sigma error<br>(cal. years) | Reference                    |
|-------------------------|---------------|------------------------------------------------|-------------------------------------------|------------------------------------|------------------------------------|----------------------------------------|-------------------------------|------------------------------|
| Green Bay Lobe          | WIS-2022      | 26060                                          | 800                                       | 29443                              | 30943                              | 30193                                  | 750                           | Black, 1976                  |
|                         | CAM-252810    | 14500                                          | 70                                        | 17560                              | 17789                              | 17675                                  | 115                           | Maher et al., 1998           |
|                         | CAM-291200    | 14210                                          | 90                                        | 17163                              | 17446                              | 17305                                  | 142                           | Maher et al., 1998           |
|                         | CAM-291210    | 13980                                          | 190                                       | 16646                              | 17248                              | 16947                                  | 301                           | Maher et al., 1998           |
|                         | CAM-291190    | 13150                                          | 120                                       | 15601                              | 15994                              | 15798                                  | 197                           | Maher et al., 1998           |
|                         | WIS-2293      | 12965                                          | 200                                       | 15210                              | 15802                              | 15506                                  | 296                           | Maher and Mickelson, 1996    |
|                         | Beta-119360   | 13370                                          | 90                                        | 15954                              | 16224                              | 16089                                  | 135                           | Mickelson et al., 2007       |
|                         | WIS-431       | 13120                                          | 130                                       | 15530                              | 15966                              | 15748                                  | 218                           | Black, 1976                  |
|                         | W-1004        | 12880                                          | 130                                       | 15192                              | 15598                              | 15395                                  | 203                           | Maher and Mickelson, 1996    |
|                         | W-1075        | 12520                                          | 160                                       | 14408                              | 15081                              | 14745                                  | 337                           | Maher and Mickelson, 1996    |
|                         | W-1073        | 12260                                          | 120                                       | 13989                              | 14496                              | 14243                                  | 254                           | Maher and Mickelson, 1996    |
|                         | 2creeks_avg   | 11850                                          | 200                                       | 13465                              | 13930                              | 13698                                  | 233                           | Maher and Mickelson, 1996    |
|                         | socha_2creeks | 11690                                          | 70                                        | 13446                              | 13572                              | 13509                                  | 63                            | Socha, 2007                  |
|                         | socha_2creeks | 12110                                          | 70                                        | 13847                              | 14066                              | 13957                                  | 110                           | Socha, 2007                  |
|                         | socha_2creeks | 11210                                          | 100                                       | 12976                              | 13198                              | 13087                                  | 111                           | Socha, 2007                  |
|                         | socha_2creeks | 11820                                          | 100                                       | 13552                              | 13751                              | 13652                                  | 100                           | Socha, 2007                  |
|                         | B4003         | 11620                                          | 50                                        | 13395                              | 13538                              | 13467                                  | 72                            | Kaiser, 1994                 |
|                         | b4005         | 11640                                          | 30                                        | 13430                              | 13537                              | 13484                                  | 54                            | Kaiser, 1994                 |
|                         | b4742         | 11560                                          | 40                                        | 13351                              | 13445                              | 13398                                  | 47                            | Kaiser, 1994                 |
|                         | eth8270       | 11865                                          | 65                                        | 13601                              | 13744                              | 13673                                  | 72                            | Kaiser, 1994                 |
|                         | eth8271       | 11760                                          | 90                                        | 13482                              | 13708                              | 13595                                  | 113                           | Kaiser, 1994                 |
|                         | eth8272       | 11915                                          | 100                                       | 13576                              | 13842                              | 13709                                  | 133                           | Kaiser, 1994                 |
|                         | eth8273       | 12035                                          | 60                                        | 13784                              | 13959                              | 13872                                  | 88                            | Kaiser, 1994                 |
|                         | eth8274       | 11885                                          | 100                                       | 13566                              | 13795                              | 13681                                  | 115                           | Kaiser, 1994                 |
|                         | eth8608       | 11965                                          | 95                                        | 13715                              | 13980                              | 13848                                  | 133                           | Kaiser, 1994                 |
|                         | eth8609       | 11890                                          | 95                                        | 13570                              | 13792                              | 13681                                  | 111                           | Kaiser, 1994                 |
|                         | eth8610       | 11805                                          | 95                                        | 13549                              | 13742                              | 13646                                  | 97                            | Kaiser, 1994                 |
|                         | eth8611       | 11980                                          | 95                                        | 13731                              | 13980                              | 13856                                  | 125                           | Kaiser, 1994                 |
|                         | eth8612       | 12015                                          | 90                                        | 13760                              | 13981                              | 13871                                  | 111                           | Kaiser, 1994                 |
|                         | wis1653       | 11690                                          | 130                                       | 13401                              | 13708                              | 13555                                  | 154                           | Kaiser, 1994                 |
|                         | DAL-340       | 9545                                           | 225                                       | 10584                              | 11179                              | 10882                                  | 298                           | Hughes and Merry, 1978       |
|                         | W-3904        | 9780                                           | 250                                       | 10753                              | 11607                              | 11180                                  | 427                           | Hughes and Merry, 1978       |
|                         | W-3866        | 9850                                           | 300                                       | 10784                              | 11807                              | 11296                                  | 512                           | Hughes and Merry, 1978       |
|                         | DAL-338       | 10220                                          | 215                                       | 11419                              | 12384                              | 11902                                  | 483                           | Hughes and Merry, 1978       |
|                         | W-3896        | 10330                                          | 300                                       | 11629                              | 12565                              | 12097                                  | 468                           | Hughes and Merry, 1978       |
|                         | A-7878        | 9895                                           | 55                                        | 11232                              | 11349                              | 11291                                  | 59                            | Lowell et al., 1999b         |
|                         | A-7876        | 9910                                           | 55                                        | 11240                              | 11390                              | 11315                                  | 75                            | Lowell et al., 1999b         |
|                         | A-7877        | 9965                                           | 55                                        | 11267                              | 11599                              | 11433                                  | 166                           | Lowell et al., 1999b         |
|                         | A-7879        | 10040                                          | 55                                        | 11399                              | 11701                              | 11550                                  | 151                           | Lowell et al., 1999b         |
|                         | A-7881        | 10040                                          | 65                                        | 11396                              | 11707                              | 11552                                  | 156                           | Lowell et al., 1999b         |
|                         | A-7883        | 10050                                          | 55                                        | 11404                              | 11706                              | 11555                                  | 151                           | Lowell et al., 1999b         |
|                         | A-7880        | 10075                                          | 95                                        | 11397                              | 11814                              | 11606                                  | 209                           | Lowell et al., 1999b         |
|                         | A-7882        | 10155                                          | 65                                        | 11650                              | 11982                              | 11816                                  | 166                           | Lowell et al., 1999b         |
|                         | A-7875        | 10200                                          | 55                                        | 11774                              | 12013                              | 11894                                  | 120                           | Lowell et al., 1999b         |
|                         | WIS-442       | 15560                                          | 150                                       | 18659                              | 18957                              | 18808                                  | 149                           | Bender et al., 1971          |
|                         | WIS-1519      | 15940                                          | 150                                       | 19033                              | 19426                              | 19230                                  | 197                           | Steventon and Kutzbach, 1985 |
|                         | WIS-1515      | 16580                                          | 120                                       | 19833                              | 20171                              | 20002                                  | 169                           | Steventon and Kutzbach, 1985 |
|                         | MAR-1-P       | 17020                                          | 70                                        | 20427                              | 20638                              | 20533                                  | 106                           | Carson et al., 2012          |
|                         | L-1064        | 13300                                          | 300                                       | 15514                              | 16413                              | 15964                                  | 450                           | Farrand et al., 1969         |
| Northern Green Bay Lobe | CAM-252810    | 14500                                          | 70                                        | 17560                              | 17789                              | 17675                                  | 115                           | Maher et al., 1998           |
|                         | CAM-291200    | 14210                                          | 90                                        | 17163                              | 17446                              | 17305                                  | 142                           | Maher et al., 1998           |
|                         | CAM-291210    | 13980                                          | 190                                       | 16646                              | 17248                              | 16947                                  | 301                           | Maher et al., 1998           |
|                         | CAM-291190    | 13150                                          | 120                                       | 15601                              | 15994                              | 15798                                  | 197                           | Maher et al., 1998           |
|                         | WIS-2293      | 12965                                          | 200                                       | 15210                              | 15802                              | 15506                                  | 296                           | Maher and Mickelson, 1996    |
|                         | L-1064        | 13300                                          | 300                                       | 15514                              | 16413                              | 15964                                  | 450                           | Farrand et al., 1969         |
| Lake Michigan Lobe      | ISGS-3021     | 23230                                          | 550                                       | 26885                              | 27926                              | 27406                                  | 521                           | Hansel and Johnson, 1996     |
|                         | ISGS-1486     | 21460                                          | 470                                       | 25212                              | 26201                              | 25707                                  | 495                           | Garry et al., 1990           |
|                         | ISGS-2484     | 21370                                          | 240                                       | 25470                              | 25910                              | 25690                                  | 220                           | Hansel and Johnson, 1996     |
|                         | W-349         | 20340                                          | 500                                       | 23932                              | 25148                              | 24540                                  | 608                           | Hansel and Johnson, 1996     |
|                         | ISGS-2047     | 20020                                          | 230                                       | 23809                              | 24356                              | 24083                                  | 274                           | Hansel and Johnson, 1996     |
|                         | ISGS-3100     | 19830                                          | 190                                       | 23631                              | 24088                              | 23860                                  | 229                           | Hansel and Johnson, 1996     |
|                         | ISGS-532      | 19680                                          | 460                                       | 23107                              | 24207                              | 23657                                  | 550                           | Hansel and Johnson, 1996     |
|                         | UCIAMS-23773  | 15150                                          | 45                                        | 18342                              | 18491                              | 18417                                  | 75                            | Curry, 2008                  |
|                         | UCIAMS-23772  | 15740                                          | 150                                       | 18829                              | 19171                              | 19000                                  | 171                           | Curry, 2008                  |
|                         | UCIAMS-23765  | 17290                                          | 140                                       | 20651                              | 21037                              | 20844                                  | 193                           | Curry, 2008                  |
|                         | UCIAMS-23768  | 15125                                          | 45                                        | 18314                              | 18466                              | 18390                                  | 76                            | Curry, 2008                  |
|                         | UCIAMS-23770  | 17090                                          | 190                                       | 20371                              | 20866                              | 20619                                  | 248                           | Curry, 2008                  |
|                         | UCIAMS-23769  | 17250                                          | 60                                        | 20690                              | 20900                              | 20795                                  | 105                           | Curry, 2008                  |
|                         | OxA-W917-11   | 16700                                          | 90                                        | 20018                              | 20280                              | 20149                                  | 131                           | Curry, 2008                  |

|                       |                 |       |     |       |       |       |     |                           |
|-----------------------|-----------------|-------|-----|-------|-------|-------|-----|---------------------------|
|                       | OxA-W917-9      | 17610 | 270 | 20927 | 21654 | 21291 | 364 | Curry, 2008               |
|                       | ISGS-767        | 17690 | 270 | 21041 | 21764 | 21403 | 362 | Hansel and Johnson, 1992  |
|                       | UCIAMS-26260    | 17760 | 60  | 21385 | 21629 | 21507 | 122 | Curry and Petras, 2011    |
|                       | UCIAMS-26261    | 18210 | 60  | 21945 | 22188 | 22067 | 122 | Curry and Petras, 2011    |
|                       | OxA-W814-13     | 17540 | 130 | 20991 | 21391 | 21191 | 200 | Curry et al., 1999        |
|                       | ISGS-A-0164     | 16540 | 120 | 19779 | 20115 | 19947 | 168 | Patterson et al., 2003    |
|                       | ISGS-465        | 15240 | 120 | 18367 | 18642 | 18505 | 138 | Hansel and Johnson, 1992  |
|                       | ISGS-A-0165     | 14860 | 110 | 17938 | 18221 | 18080 | 142 | Patterson et al., 2003    |
|                       | ISGS-A-0143     | 14610 | 110 | 17648 | 17924 | 17786 | 138 | Curry and Petras, 2011    |
|                       | ISGS-1550       | 14330 | 200 | 17160 | 17705 | 17433 | 273 | Hansel and Johnson, 1992  |
|                       | UCIAMS-46831    | 14780 | 50  | 17895 | 18060 | 17978 | 83  | Curry, 2008               |
|                       | UCIAMS-26265    | 14860 | 40  | 17974 | 18142 | 18058 | 84  | Curry and Petras, 2011    |
|                       | ISGS-1570       | 14100 | 640 | 16234 | 17917 | 17076 | 842 | Hansel and Johnson, 1996  |
|                       | ISGS-1649       | 13890 | 120 | 16623 | 17031 | 16827 | 204 | Hansel and Johnson, 1996  |
|                       | UCIAMS-26262    | 14070 | 40  | 17009 | 17197 | 17103 | 94  | Curry, 2008               |
|                       | UCIAMS-26263    | 14110 | 35  | 17063 | 17256 | 17160 | 97  | Curry, 2008               |
|                       | UCIAMS-26264    | 14420 | 40  | 17490 | 17649 | 17570 | 80  | Curry, 2008               |
|                       | ISGS-1549       | 13870 | 170 | 16525 | 17064 | 16795 | 270 | Hansel and Johnson, 1996  |
|                       | UICAMS-46829    | 13650 | 40  | 16336 | 16547 | 16442 | 106 | Curry, 2008               |
|                       | UCIAMS-63075    | 13695 | 45  | 16387 | 16626 | 16507 | 120 | Curry and Petras, 2011    |
|                       | UCIAMS-63076    | 13910 | 35  | 16767 | 16984 | 16876 | 109 | Curry and Petras, 2011    |
|                       | ISGS-1378       | 13470 | 130 | 16019 | 16404 | 16212 | 193 | Monaghan and Hansel, 1990 |
|                       | L-1064          | 13300 | 300 | 15514 | 16413 | 15964 | 450 | Farrand et al., 1969      |
|                       | IGS-482         | 12410 | 120 | 14204 | 14764 | 14484 | 280 | Hansel and Johnson, 1996  |
|                       | ISGS-1061       | 11700 | 110 | 13423 | 13706 | 13565 | 142 | Liu et al., 1986          |
|                       | ISGS-1234       | 11650 | 170 | 13301 | 13704 | 13503 | 202 | Garry et al., 1990        |
| Miami/Scioto<br>Lobes | 22 (Beta-72287) | 18460 | 90  | 22251 | 22456 | 22354 | 103 | Glover et al., 2011       |
|                       | DIC-243         | 14810 | 170 | 17831 | 18253 | 18042 | 211 | Glover et al., 2011       |
|                       | DIC-510         | 14890 | 130 | 17956 | 18275 | 18116 | 160 | Glover et al., 2011       |
|                       | CAMS-2409       | 11680 | 90  | 13408 | 13589 | 13499 | 91  | Glover et al., 2011       |
|                       | ISGS-1677       | 12210 | 150 | 13816 | 14392 | 14104 | 288 | Glover et al., 2011       |
|                       | ISGS-1055       | 13510 | 160 | 16041 | 16514 | 16278 | 237 | Glover et al., 2011       |
|                       | ETH-30202       | 15710 | 90  | 18842 | 19052 | 18947 | 105 | Glover et al., 2011       |
|                       | Beta-158291     | 11860 | 270 | 13420 | 14051 | 13736 | 316 | Glover et al., 2011       |
|                       | AA-45069        | 15810 | 140 | 18897 | 19236 | 19067 | 170 | Glover et al., 2011       |
|                       | AA-45069b       | 15350 | 100 | 18519 | 18736 | 18628 | 109 | Glover et al., 2011       |
|                       | AA-45073        | 15503 | 91  | 18674 | 18856 | 18765 | 91  | Glover et al., 2011       |
|                       | AA-45074        | 14986 | 98  | 18076 | 18344 | 18210 | 134 | Glover et al., 2011       |
|                       | AA-45077        | 14360 | 120 | 17317 | 17668 | 17493 | 176 | Glover et al., 2011       |
|                       | AA53435         | 15564 | 88  | 18733 | 18902 | 18818 | 85  | Glover et al., 2011       |
|                       | AA-45078        | 14600 | 91  | 17657 | 17900 | 17779 | 122 | Glover et al., 2011       |
|                       | AA-45079        | 16170 | 97  | 19366 | 19649 | 19508 | 142 | Glover et al., 2011       |
|                       | AA53419         | 15869 | 91  | 18987 | 19248 | 19118 | 131 | Glover et al., 2011       |
|                       | AA53425         | 16400 | 170 | 19585 | 19996 | 19791 | 206 | Glover et al., 2011       |
|                       | AA53442         | 16010 | 100 | 19184 | 19475 | 19330 | 146 | Glover et al., 2011       |
|                       | AA53429         | 10676 | 58  | 12596 | 12692 | 12644 | 48  | Glover et al., 2011       |
|                       | AA53418         | 15640 | 97  | 18780 | 18978 | 18879 | 99  | Glover et al., 2011       |
|                       | AA53423         | 16128 | 90  | 19326 | 19586 | 19456 | 130 | Glover et al., 2011       |
|                       | Beta-190863     | 16050 | 90  | 19240 | 19500 | 19370 | 130 | Glover et al., 2011       |
|                       | ETH-28523       | 15560 | 100 | 18718 | 18909 | 18814 | 96  | Glover et al., 2011       |
|                       | CAMS-27129      | 15630 | 150 | 18722 | 19037 | 18880 | 158 | Glover et al., 2011       |
|                       | CAMS-27130      | 15770 | 80  | 18910 | 19116 | 19013 | 103 | Glover et al., 2011       |
|                       | ETH-32177       | 14780 | 100 | 17854 | 18118 | 17986 | 132 | Glover et al., 2011       |
|                       | Beta-194054     | 13690 | 50  | 16376 | 16621 | 16499 | 123 | Glover et al., 2011       |
|                       | Beta-190864     | 13880 | 70  | 16675 | 16965 | 16820 | 145 | Glover et al., 2011       |
|                       | PITT-0227       | 19960 | 170 | 23809 | 24229 | 24019 | 210 | Lowell et al., 1990       |
|                       | PITT-0506       | 19310 | 170 | 23031 | 23478 | 23255 | 224 | Lowell et al., 1990       |
|                       | PITT-0507       | 20200 | 140 | 24093 | 24440 | 24267 | 174 | Lowell et al., 1990       |
|                       | PITT-0508       | 19200 | 140 | 22941 | 23344 | 23143 | 202 | Lowell et al., 1990       |
|                       | PITT-0509       | 19690 | 150 | 23531 | 23912 | 23722 | 191 | Lowell et al., 1990       |
|                       | OWU-76          | 17290 | 436 | 20338 | 21459 | 20899 | 561 | Dyke, 2004                |
|                       | OWU-83          | 14780 | 192 | 17753 | 18231 | 17992 | 239 | Dyke, 2004                |

\*Calibrated using Calib 7.0 and IntCal13 (Stuiver and Reimer, 1993; Reimer et al., 2013)

## Supplementary References

- Abe-Ouchi, A., Segawa, T., and Saito, F., 2007, Climatic conditions for modeling the Northern Hemisphere ice sheets throughout the ice age cycle: *Climate of the Past*, v. 3, p. 423-438.
- Anslow, F.S., Hostetler, S., Bidlake, W.R., and Clark, P.U., 2008, Distributed energy balance modeling of South Cascade Glacier, Washington and assessment of model uncertainty: *Journal of Geophysical Research*, v. 113, F02019.
- Argus, D.F. and Peltier, W.R., 2010, Constraining models of postglacial rebound using space geodesy: a detailed assessment of model ICE-5G (VM2) and its relatives: *Geophysical Journal International*, v. 181, p. 697-723.
- Attig, J.W., Clayton, L., and Mickelson, D.M., 1985, Correlation of late Wisconsin glacial phases in the western Great Lakes area: *Geological Society of America Bulletin*, v. 96, p. 1585-1593.
- Balco, G., Stone, J.O., Lifton, N.A., and Dunai, T.J., 2008, A complete and easily accessible means of calculating surface exposure ages or erosion rates from  $^{10}\text{Be}$  and  $^{26}\text{Al}$  measurements: *Quaternary Geochronology*, v. 3, p. 174-195.
- Balco, G., Briner, J., Finkel, R.C., Rayburn, J.A., Ridge, J.C., and Schaefer, J.M., 2009, Regional beryllium-10 production rate calibration for late-glacial northeastern North America: *Quaternary Geochronology*, v. 4, p. 93-107.
- Bender, M.M., Bryson, R.A., and Baerreis, D.A., 1971, University of Wisconsin radiocarbon dates IX: *Radiocarbon*, v. 13, p. 475-486.
- Berger, A. and Loutre, M.F., 1991, Insolation values for the climate of the last 10 million years: *Quaternary Science Reviews*, v. 10, p. 297-317.
- Bevington, P. and Robinson, D.K., 2002, Data reduction and error analysis for the physical sciences, 3<sup>rd</sup> Ed.: McGraw-Hill, Boston, 336 p.
- Black, R.F., 1976, Quaternary geology of Wisconsin and upper Michigan, *in* Mahaney, W.C., ed., *Quaternary Stratigraphy of North America*: Stroudsber, PA, Dowden, Hutchinson, and Ross, p. 93-117.
- Cannon, W.F., LaBerge, G.L., Klasner, J.S., Schulz, K.J., 2007, The Gogebic Iron Range--A sample of the northern margin of the Penokean fold and thrust belt: *USGS Professional Paper 1730*, 44 p.
- Carlson, A.E., Anslow, F.S., Obbink, E.A., LeGrande, A.N., Ullman, D.J., and Licciardi, J.M., 2009, Surface-melt driven Laurentide Ice sheet retreat during the early Holocene: *Geophysical Research Letters*, v. 36, L24502.
- Carlson, A.E., Ullman, D.J., Anslow, F.S., He, F., Clark, P.U., Liu, Z., and Otto-Bliesner, B.L., 2012, Modeling the surface mass-balance response of the Laurentide Ice Sheet to Bølling warming and its contribution to Meltwater Pulse 1A: *Earth and Planetary Science Letters*, v. 315-316, p. 24-29.
- Carson, E.C., Hanson, P.R., Attig, J.W., and Young, A.R., 2012, Numeric control on the late-glacial chronology of the southern Laurentide Sheet derived from ice-proximal lacustrine deposits: *Quaternary Research*, v. 78, p. 583-589.
- Clark, P.U., 1992, Surface form of the southern Laurentide Ice Sheet and implications to ice-sheet dynamics: *Geological Society of America Bulletin*, v. 104, p. 595-605.

- Clark, P.U., Licciardi, J.M., MacAyeal, D.R., and Jenson, J.W., 1996, Numerical reconstruction of a soft-bedded Laurentide Ice Sheet during the last glacial maximum: *Geology*, v. 24, p. 679-682.
- Clark, P.U., Dyke, A.S., Shakun, J.D., Carlson, A.E., Clark, J., Wohlfarth, B., Mitrovica, J.X., Hostetler, S.W., and McCabe, A.M., 2009, The Last Glacial Maximum: *Science*, v. 325, p. 710-714.
- Clayton, L. and Attig, J.W., 1990, *Geology of Sauk County, Wisconsin: Wisconsin Geological and Natural History Survey Information Circular*, v. 67, 68 p.
- Colgan, P.M., Bierman, P.R., Mickelson, D.M., and Caffee, M., 2002, Variation in glacial erosion near the southern margin of the Laurentide Ice Sheet, south-central Wisconsin, USA: Implications for cosmogenic dating of glacial terrains: *Geological Society America Bulletin*, v. 114, p. 1581-1591.
- Corbett, L.B., Bierman, P.R., Graly, J.A., Neumann, T.A., and Rood, D.H., 2013, Constraining landscape history and glacial erosivity using paired cosmogenic nuclides in Upernavik, northwest Greenland: *Geological Society of America Bulletin*, doi:10.1130/B30813.1.
- Curry, B.B., Grimley, D.A., and Stravers, J.A., 1999, Quaternary geology, geomorphology, and climatic history of Kane County, Illinois: *Illinois State Geological Survey Guidebook*, v. 28, 40 p.
- Curry, B.B., 2008, Deglacial History and Paleoenvironments of North-eastern Illinois, 54<sup>th</sup> Midwest Friends of the Pleistocene Field Conference, May 16-18, 2008: *Illinois State Geological Survey Open File Series 2008-1*, 175 p.
- Curry, B. and Petras, J., 2011, Chronological framework for the deglaciation of the Lake Michigan lobe of the Laurentide Ice Sheet from ice-walled lake deposits: *Journal of Quaternary Science*, v. 26, p. 402-410.
- Desilets, D., Zreda, M. and Prabu, T., 2006, Extended scaling factors for in situ cosmogenic nuclides: new measurements at low latitude: *Earth and Planetary Science Letters*, v. 246, p. 265-276.
- Dunai, T., 2001, Influence of secular variation of the magnetic field on production rates of in situ produced cosmogenic nuclides: *Earth and Planetary Science Letters*, v. 193, p. 197-212.
- Duynkerke, P.D. and van den Broeke, M.R., 1994, Surface energy balance and katabatic flow over glacier and tundra during GIMEX-91: *Global and Planetary Change*, v. 9, p. 17-28.
- Dyke, A.S., 2004, An outline of North American deglaciation with emphasis on central and northern Canada, *in* Ehlers, J. and Gibbard, P.L., eds., *Quaternary Glaciations-Extent and Chronology, Part II: Amsterdam, Elsevier Science and Technology Books*, p. 373-424.
- Dyke, A.S., Andrews, J.T., Clark, P.U., England, J.H., Miller, G.H., Shaw, J., and Veillette, J.J., 2002, The Laurentide and Innuitian ice sheets during the Last Glacial Maximum: *Quaternary Science Reviews*, v. 21, p. 9-31.
- Eckberg, M.P., Lowell, T.V., and Stuckenrath, R., 1993, Late Wisconsin glacial advance and retreat patterns in southwestern Ohio, USA: *Boreas* v. 22, p. 189-204.
- Farrand, W.R., Benninghoff, W.S., Zhner, R., 1969, Cary-Port Huron Interstade: evidence from a buried bryophyte bed, Cheboygan County, Michigan: *Geological Society of America Special Paper*, v. 123, p. 249-262.

- Garry, C.E., Baker, R.W., Schwert, D.P., and Schneider, A.F., 1990, Environmental analysis of a Twocreekan-aged beetle (Coleoptera) assemblage from Kewaunee, Wisconsin: Geological Society of America Special Paper, v. 251, p. 57-66.
- Glover, K.C., Lowell, T.V., Wiles, G.C., Pair, D., Applegate, P., and Hajdas, I., 2011, Deglaciation, basin formation and post-glacial climate change from a regional network of sediment core sites in Ohio and eastern Indiana: *Quaternary Research*, v. 76, p. 401-410.
- Grainger, M.E. and Lister, H., 1966, Wind speed, stability and eddy viscosity over melting ice surfaces: *Journal of Glaciology*, v. 6, p. 101-127.
- Greuell, W. and Konzelmann, T., 1994, Numerical modelling of the energy balance and the englacial temperature of the Greenland Ice Sheet. Calculations for the ETH-Camp location (West Greenland, 1155 m a.s.l.): *Global and Planetary Change*, v. 9, p. 91-114.
- Hansel, A.K. and Johnson, W.H., 1992, Fluctuations of the Lake Michigan lobe during the late Wisconsin subepisode: *Sveriges Geologiska Undersökning*, v. 81, p. 133-144.
- Hansel, A.K. and Johnson, W.H., 1996, Wedron and Mason Groups: Lithostratigraphic reclassification of deposits of the Wisconsin Episode, Lake Michigan Lobe area: *Illinois State Geological Survey Bulletin*, v. 104, 116 p.
- Hooyer, T.S., 2007, Evolution of glacial Lake Oshkosh and the Fox River Lowland, *in* Hooyer, T.S., ed., Late-glacial history of east-central Wisconsin, Guide Book for the 53rd Midwest Friends of the Pleistocene Field Conference, May 18-20, 2007, Oshkosh, WI: Wisconsin Geological and Natural History Survey Open-File Report 2007-01, p. 1-16.
- Hughes, L. and Merry, W.J., 1978, Marquette buried forest 9,850 years old: *American Association for the Advancement of Science, Abstract for Annual Meeting*, no. 12-14.
- Johnson, M.D., 1986, Pleistocene geology of Barron County, Wisconsin: Wisconsin Geological and Natural History Survey Information Circular, v. 55, 42 p.
- Kaiser, K.F., 1994, Two Creeks Interstade dated through dendrochronology and AMS: *Quaternary Research*, v. 42, p. 288-298.
- Lal, D., 1991, Cosmic ray labeling of erosion surfaces: in situ nuclide production rates and erosion models: *Earth and Planetary Science Letters*, v. 104, p. 424-439.
- Lambeck, K., Purcell, A., Zhao, J., and Svensson, N.O., 2010, The Scandinavian Ice Sheet: from MIS 4 to the end of the Last Glacial Maximum: *Boreas*, v. 39, p. 410-435.
- Licciardi, J.M., Clark, P.U., Jenson, J.W., and Macayeal, D.R., 1998, Deglaciation of a soft-bedded Laurentide Ice Sheet: *Quaternary Science Reviews*, v. 17, p. 427-448.
- Lifton, N.A., Bieber, J.W., Clem, J.M., Duldig, M.L., Evenson, P., Humble, J.E., and Pyle, R., 2005, Addressing solar modulation and long-term uncertainties in scaling secondary cosmic rays for in situ cosmogenic nuclide applications: *Earth and Planetary Science Letters*, v. 239, p. 140-161.
- Lowell, T.V., Savage, K.M., Brockman, C.S., and Stuckenrath, R., 1990, Radiocarbon analyses from Cincinnati, Ohio, and their implications for glacial stratigraphic interpretations: *Quaternary Research*, v. 34, p. 1-11.
- Lowell, T.V., Larson, G.J., Hughes, J.D., and Denton, G.H., 1999a, Age verification of the Lake Gribben forest bed and the Younger Dryas advance of the Laurentide Ice Sheet: *Canadian Journal of Earth Sciences*, v. 36, p. 383-393.

- Lowell, T.V., Hayward, R.K. and Denton, G.H., 1999b, Role of climate oscillations in determining ice-margin position: hypothesis, examples, and implications: Geological Society of America Special Paper, v. 337, p. 193- 203.
- Maher, L.J., Jr. and Mickelson, D.M., 1996, Palynological and radiocarbon evidence for deglaciation events in the Green Bay Lobe, Wisconsin: Quaternary Research, v. 46, p. 251-259.
- Maher, L.J., Jr., Miller, N.G., Baker, R.G., Curry, B.B., and Mickelson, D.M., 1998, Paleobiology of the sand beneath the Valders diamicton at Valders, Wisconsin: Quaternary Research, v. 49, p. 208-221.
- Mickelson, D.M., 1986, Glacial and related deposits of Langlade County, Wisconsin: Wisconsin Geological and Natural History Survey Information Circular, v. 52, 30 p.
- Mickelson, D.M., Hooyer, T.S., Socha, B.J. and Winguth, C., 2007, Late glacial ice advances and vegetation changes in east-central Wisconsin, *in* Hooyer, T.S., ed., Late-glacial history of east-central Wisconsin, Guide Book for the 53rd Midwest Friends of the Pleistocene Field Conference, May 18-20, 2007, Oshkosh, WI: Wisconsin Geological and Natural History Survey Open-File Report 2007-01, p. 73-87.
- Monaghan, G.W. and Hansel, A.K., 1990, Evidence for the intra-Glenwood (Mackinaw) low-water phase of glacial Lake Chicago: Canadian Journal of Earth Science, v. 27, p. 1236-1241.
- Mudrey, M.G., Brown, B.A., and Greenberg, J.K., 1982, Bedrock geologic map of Wisconsin: University of Wisconsin-Extension, Geological and Natural History Survey.
- Murray, D.S., Carlson, A.E., Singer, B.S., Anslow, F.S., He, F., Caffee, M., Marcott, S.A., Liu Z. and Otto-Bliesner, B.L., 2012, Northern Hemisphere forcing of the last deglaciation in southern Patagonia: Geology, v. 40, p. 631-634.
- Patterson, C.J., Hansel, A.K., Mickelson, D.M., Quade, D.J., Bettis III, E.A., Colgan, P.M., McKay, E.D., Stumpf, A.J., 2003, Contrasting glacial landscapes created by ice lobes of the southern Laurentide Ice Sheet, *in* Eastbrook, D.J., ed., Quaternary Geology of the United States, INQUA 2003 Field Guide Volume: Reno, Desert Research Institute, p. 135-154.
- Peltier, W.R., 2004, Global glacial isostasy and the surface of the ice-age earth: the ICE-5G (VM2) model and GRACE: Annual Reviews of Earth and Planetary Science, v. 32, p. 111-149.
- Reimer, P.J. and 29 others, 2013, IntCal13 and Marine13 radiocarbon age calibration curves 0-50,000 years cal BP: Radiocarbon, v. 55, p. 1869-1887.
- Rinterknecht, V.R., Clark, P.U., Raisbeck, G.M., Yiou, F., Bitinas, A., Brook, E.J., Marks, L., Zelcs, V., Lunkka, J.-P., Pavlovskaya, I.E., Piotrowski, J.A., and Raukas, A., 2006, The last deglaciation of the southeastern sector of the Scandinavian Ice Sheet: Science, v. 311, p. 1449-1452.
- Schmidt, G.A., and 43 others, 2014, Configuration and assessment of the GISS ModelE2 contributions to the CMIP5 archive: Journal of Advances in Modeling Earth Systems, in press.
- Schulte, L.A., Mladenoff, D.J., Crow, T.R., Merrick, L.C., and Cleland, D.T., 2007, Homogenization of northern U.S. Great Lakes forests due to land use: Landscape Ecology, v. 22, p. 1089-1103.



- Smeets, C.J.P.P. and van den Broeke, M.R., 2008, Temporal and spatial variations off the aerodynamic roughness length in the ablation zone of the Greenland ice sheet: *Boundary-Layer Meteorology*, v. 128, p. 315-338.
- Socha, B.J., 2007, Evidence of tundra plants overridden by ice approximately 16,000 cal yr BP, Sherwood, Wisconsin, Calumet County, *in* Hooyer, T.S., ed., Late-glacial history of east-central Wisconsin, Guide Book for the 53rd Midwest Friends of the Pleistocene Field Conference, May 18-20, 2007, Oshkosh, WI: Wisconsin Geological and Natural History Survey Open-File Report 2007-01, p. 73-87.
- Stevenson, R.L. and Kutzbach, J.E., 1985, University of Wisconsin radiocarbon dates XXII: *Radiocarbon*, v. 27, p. 455-469.
- Stone, J.O., 2000, Air pressure and cosmogenic isotope production: *Journal of Geophysical Research*, v. 105, p. 23753-23759.
- Stuiver, M. and Reimer, P.J., 1993, Extended  $^{14}\text{C}$  data base and revised CALIB 3.0  $^{14}\text{C}$  age calibration program: *Radiocarbon*, v. 35, p. 215-230.
- Tarasov, L. and Peltier, W.R., 2004, A geophysically constrained large ensemble analysis of the deglacial history of the North American ice-sheet complex: *Quaternary Science Reviews*, v. 23, p. 359-388.
- Tarasov, L., Dyke, A.S., Neal, R.M., Peltier, W.R., 2012, A data-calibrated distribution of deglacial chronologies for the North American ice complex from glaciological modeling: *Earth and Planetary Science Letters*, v. 315-316, p. 30-40.
- Ullman, D.J., LeGrande, A.N., Carlson, A.E., Anslow, F.S., and Licciardi, J.M., 2014, Assessing the impact of Laurentide Ice-Sheet topography on glacial climate: *Climate of the Past*, v. 10, p. 487-507.
- van de Berg, W.J., van den Broeke, M., Ettema, J., van Meijgaard, E., Kaspar, F., 2011, Significant contribution of insolation to Eemian melting of the Greenland ice sheet: *Nature Geoscience*, v. 4, p. 679-683.
- van de Wal, R.S.W., 1996, Mass-balance modelling of the Greenland ice sheet: a comparison of an energy-balance and a degree-day model, *Annals of Glaciology*, v. 23, p. 36-45.
